# Supplementary material for: A combined case-control and molecular source attribution study of human Campylobacter infections in Germany, 2011–2014
Source: PubMed Central journal article supplement (PMC5505968; doi:10.1038/s41598-017-05227-x), 2017-07-11
Supplement: 41598_2017_5227_MOESM1_ESM.pdf [file 41598_2017_5227_MOESM1_ESM.pdf]

## **SUPPLEMENTARY INFORMATION**

### **A combined case-control and molecular source attribution study of human *Campylobacter* infections in Germany, 2011-2014**

Bettina M Rosner, Anika Schielke, Xavier Didelot, Friederike Kops, Janina Breidenbach, Niklas Willrich, Greta Gölz, Thomas Alter, Kerstin Stingl, Christine Josenhans, Sebastian Suerbaum, and Klaus Stark





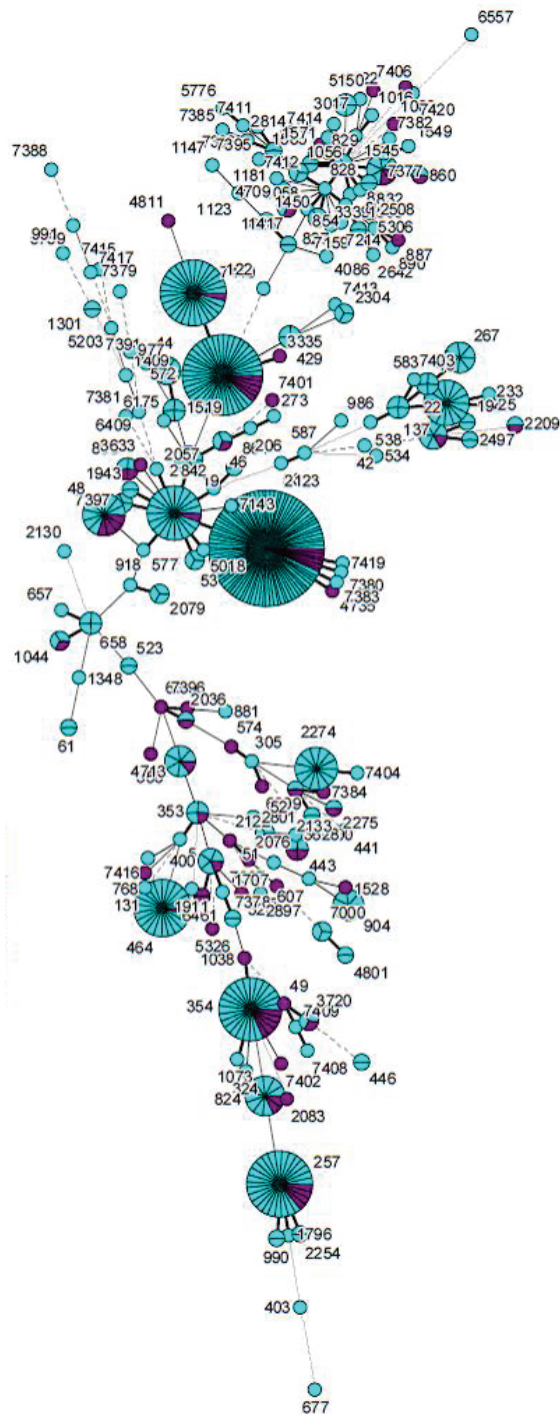

**Supplementary Figure S3: Minimum Spanning Tree generated from MLST comparisons of 613 *C. jejuni* and *C. coli* isolates from human patients.** Numbers close to nodes indicate sequence types. Colour coding according to travel history (outside of Germany) within 7 days prior to onset of symptoms: blue, no travel history; purple, recent travel.

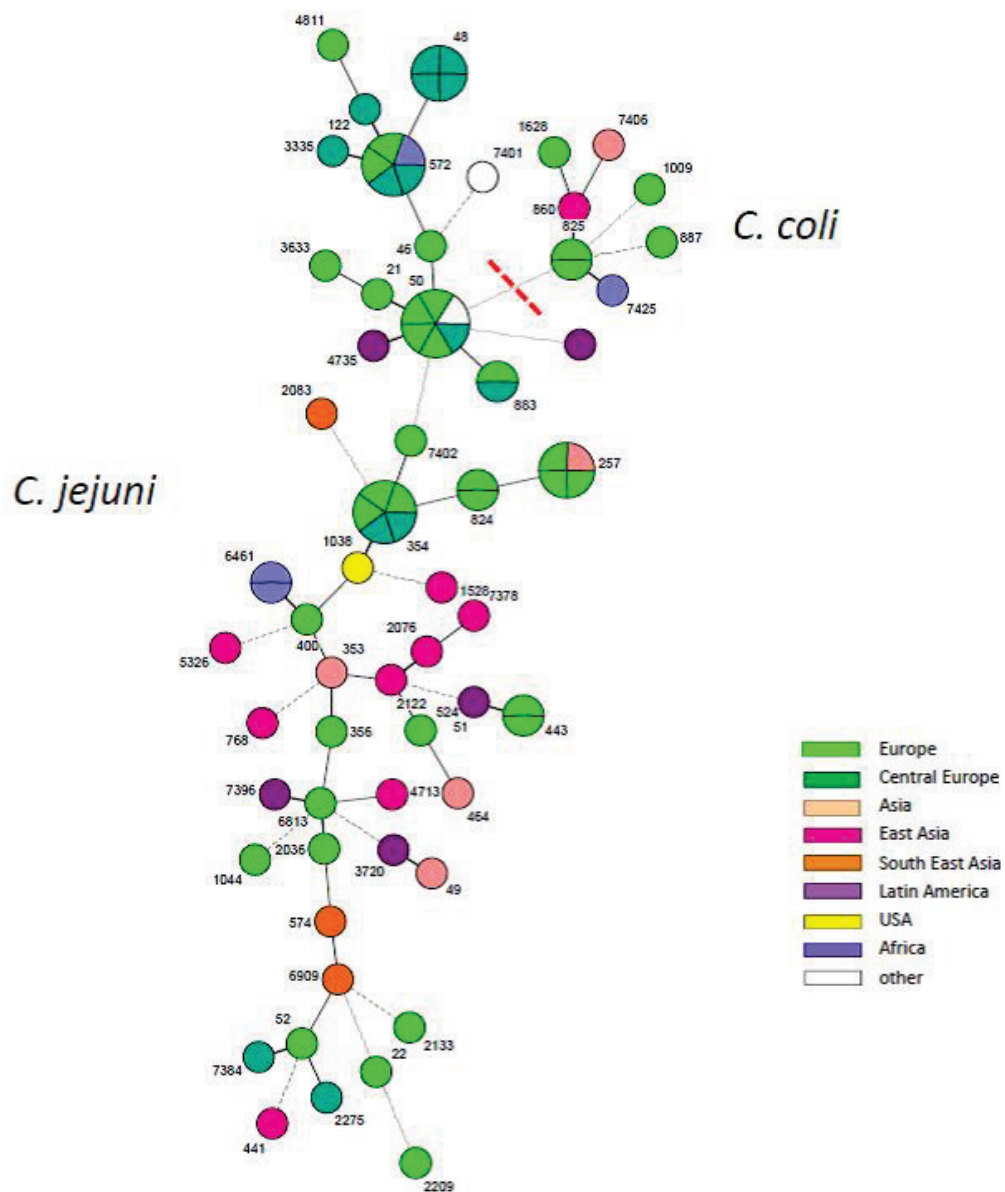

**Supplementary Figure S4: Minimum Spanning Tree generated from MLST comparisons of 80 *C. jejuni* and *C. coli* isolates from human patients who had travelled outside of Germany within 7 days prior to onset of symptoms. Numbers close to nodes indicate sequence types. Colour coding indicates destination of travel, see colour legend.**

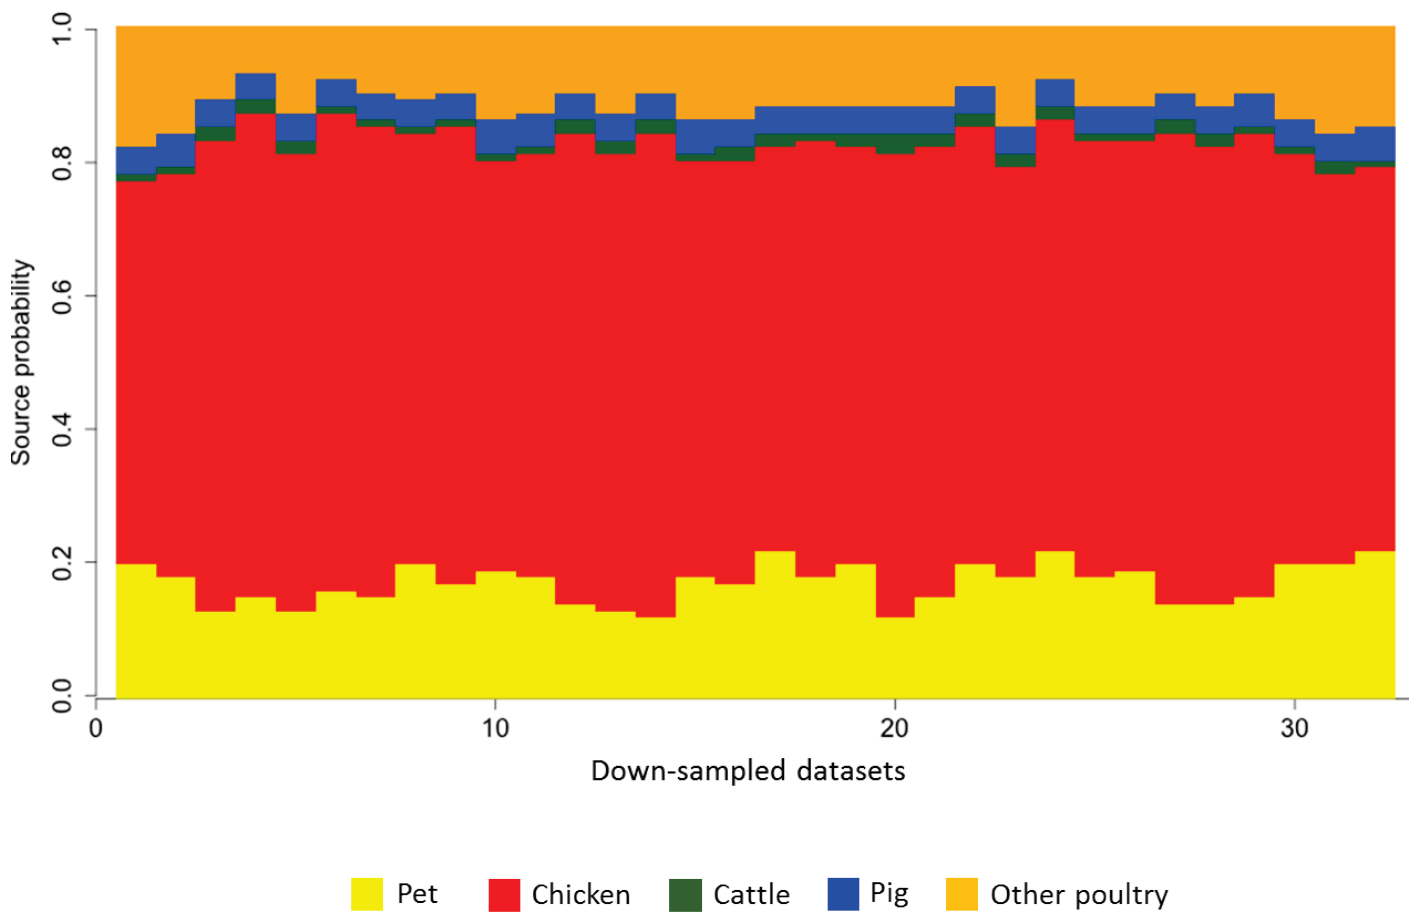

**Supplementary Figure S5. Mean posterior source probability for human isolates (n=613) to originate from one of the 5 putative sources as determined by source attribution analysis with 32 down-sampled datasets.** In each of the down-sampled datasets a random subsample of 10% of animal/food isolates was excluded to attribute the origin of the human isolates.

**Supplementary Table S1. Factors positively associated (risk factors) and factors negatively associated with *Campylobacter* infections (international travellers included in analysis).** Case-control study, Germany, 2011-2014. The proportion of exposed cases and controls is based on the number of cases and controls with complete answers in univariable analysis (without adjustment for age group, sex, federal state). Adjusted odds ratios (aOR) were determined in multivariable logistic regression analysis (adjusted for age group, sex, federal state; 1,110 cases and 2,719 controls with complete answers for all variables in final model).

| <b>Risk Factor</b>                                                  | <b>Cases exposed<br/>% (n)</b> | <b>Controls exposed<br/>% (n)</b> | <b>aOR<sup>a</sup><br/>(95% CI<sup>b</sup>)</b> | <b>Population Attributable Fraction<br/>% (95% CI<sup>b</sup>)</b> |
|---------------------------------------------------------------------|--------------------------------|-----------------------------------|-------------------------------------------------|--------------------------------------------------------------------|
| Consumed any chicken meat***                                        | 87.2<br>(1,637/1,877)          | 79.1<br>(3,127/3,954)             | 1.6<br>(1.3-2.0)                                | 32<br>(12-48)                                                      |
| Ate out (at food stand, restaurant, canteen, etc.)***               | 83.2<br>(1,656/1,990)          | 79.0<br>(3,270/4,141)             | 1.6<br>(1.3-2.0)                                | 31<br>(19-39)                                                      |
| Prepared poultry meat (packaged) in household**                     | 50.3<br>(908/1,805)            | 43.1<br>(1,681/3,898)             | 1.3<br>(1.1-1.5)                                | 11<br>(3-16)                                                       |
| Prepared uncooked food and raw meat in household at the same time** | 50.4<br>(930/1,846)            | 45.8<br>(1,770/3,867)             | 1.3<br>(1.1-1.5)                                | 11<br>(3-17)                                                       |
| Used anti-acidic drug (PPI)***                                      | 21.2<br>(420/1,979)            | 8.0<br>(324/4,077)                | 1.9<br>(1.5-2.4)                                | 10<br>(8-12)                                                       |
| Travelled abroad***                                                 | 11.8<br>(237/2,001)            | 5.2<br>(213/4,135)                | 2.2<br>(1.6-2.9)                                | 5<br>(4-6)                                                         |
| Had contact with poultry (animal)**                                 | 4.9<br>(96/1,954)              | 4.5<br>(181/4,063)                | 1.8<br>(1.3-2.6)                                | 2<br>(2-3)                                                         |
| Consumed mostly vegetarian food*                                    | 2.1<br>(40/1,865)              | 4.3<br>(167/3,870)                | 0.5<br>(0.3-1.0)                                | -                                                                  |
| Consumed (unpeeled) fruit***                                        | 62.4<br>(1,182/1,895)          | 73.0<br>(2,920/4,002)             | 0.6<br>(0.5-0.7)                                | -                                                                  |
| Consumed lamb/mutton**                                              | 9.0<br>(163/1,821)             | 9.1<br>(359/3,969)                | 0.6<br>(0.5-0.8)                                | -                                                                  |
| Consumed beef***                                                    | 52.0<br>(911/1,752)            | 53.0<br>(2,043/3,855)             | 0.7<br>(0.6-0.8)                                | -                                                                  |
| Had contact with dog**                                              | 29.0<br>(563/1,945)            | 32.6<br>(1,317/4,035)             | 0.8<br>(0.7-0.9)                                | -                                                                  |
| Went swimming (in pool, lake, ocean etc.)**                         | 18.3<br>(363/1,989)            | 24.9<br>(1,027/4,122)             | 0.8<br>(0.6-0.9)                                | -                                                                  |

<sup>a</sup>Adjusted odds ratios

<sup>b</sup>Confidence interval

\*indicates  $P < 0.05$  \*\*indicates  $P < 0.01$  \*\*\*indicates  $P < 0.001$

**Supplementary Table S2. Factors positively associated (risk factors) and factors negatively associated with *Campylobacter* infections attributed to the source chicken (posterior probability  $Pr \geq 0.5$ ) by source attribution using asymmetric island modelling.** Case-control study, Germany, 2011-2014. The proportion of exposed cases and controls is based on the number of cases and controls with complete answers in univariable analysis (without adjustment for age group, sex, federal state). Adjusted odds ratios (aOR) were determined in multivariable logistic regression analysis (adjusted for age group, sex, federal state; 307 cases and 2,751 controls with complete answers for all variables in final model).

| <b>Risk Factor</b>                                                        | <b>Cases exposed<br/>% (n)</b> | <b>Controls exposed<br/>% (n)</b> | <b>aOR<sup>a</sup><br/>(95% CI<sup>b</sup>)</b> | <b>Population<br/>Attributable<br/>Fraction<br/>%</b> |
|---------------------------------------------------------------------------|--------------------------------|-----------------------------------|-------------------------------------------------|-------------------------------------------------------|
| Consumed any chicken meat**                                               | 88.8<br>(395/445)              | 79.1<br>(2,967/3,753)             | 1.9<br>(1.3-2.7)                                | 41                                                    |
| Ate out<br>(at food stand, restaurant,<br>canteen, etc.)*                 | 82.0<br>(388/473)              | 78.6<br>(3,089/3,929)             | 1.5<br>(1.1-2.0)                                | 25                                                    |
| Prepared poultry meat<br>(packaged) in household**                        | 55.7<br>(241/433)              | 43.8<br>(1,617/3,692)             | 1.6<br>(1.2-2.0)                                | 21                                                    |
| Prepared uncooked food and<br>raw meat in household at the<br>same time** | 54.3<br>(244/449)              | 45.8<br>(1,684/3,677)             | 1.4<br>(1.1-1.8)                                | 17                                                    |
| Used anti-acidic drug (PPI)***                                            | 23.3<br>(110/473)              | 8.1<br>(315/3,869)                | 1.8<br>(1.3-2.5)                                | 11                                                    |
| Consumed (unpeeled) fruit***                                              | 64.1<br>(284/443)              | 72.7<br>(2,757/3,794)             | 0.6<br>(0.5-0.8)                                | -                                                     |
| Consumed any duck meat**                                                  | 15.7<br>(69/440)               | 14.9<br>(551/3,708)               | 0.6<br>(0.4-0.9)                                | -                                                     |
| Consumed any beef <sup>c</sup>                                            | 56.8<br>(237/417)              | 52.6<br>(1,923/3,654)             | 0.5<br>(0.3-0.9)                                | -                                                     |
| Had contact with dog**                                                    | 24.8<br>(114/460)              | 32.8<br>(1,256/3,828)             | 0.7<br>(0.5-0.9)                                | -                                                     |

<sup>a</sup>Adjusted odds ratio

<sup>b</sup>Confidence interval

<sup>c</sup> $P=0.051$

\*indicates  $P < 0.05$  \*\*indicates  $P < 0.01$  \*\*\*indicates  $P < 0.001$



**Supplementary Table S3. MLST data and origin of animal and food isolates obtained during the study period (2011-2014) from samples taken in the study region through the FBI-Zoo-network (n=203; see Table 1, column 1).** Isolates from pets, chickens, pigs, cattle and poultry other than chicken (ducks, geese, turkeys, quails) (n=188) were used for source attribution analysis, supplemented with MLST data from additional isolates obtained in Germany or in neighbouring countries.

| Isolate Designation | ST   | CC             | aspA | glnA | gltA | glyA | pgm | tkf | uncA | Origin | Animal Type | Animal Material | Food Material | Species   | Source (For Source Attribution) |
|---------------------|------|----------------|------|------|------|------|-----|-----|------|--------|-------------|-----------------|---------------|-----------|---------------------------------|
| 1                   | 11   | ST-45 complex  | 48   | 7    | 10   | 4    | 1   | 7   | 1    | Animal | Dog         |                 |               | C. jejuni | Pet                             |
| 2                   | 19   | ST-21 complex  | 2    | 1    | 5    | 3    | 2   | 1   | 5    | Animal | Dog         |                 |               | C. jejuni | Pet                             |
| 3                   | 19   | ST-21 complex  | 2    | 1    | 5    | 3    | 2   | 1   | 5    | Animal | Dog         |                 |               | C. jejuni | Pet                             |
| 4                   | 19   | ST-21 complex  | 2    | 1    | 5    | 3    | 2   | 1   | 5    | Animal | Dog         |                 |               | C. jejuni | Pet                             |
| 5                   | 22   | ST-22 complex  | 1    | 3    | 6    | 4    | 3   | 3   | 3    | Animal | Cat         |                 |               | C. jejuni | Pet                             |
| 7                   | 50   | ST-21 complex  | 2    | 1    | 12   | 3    | 2   | 1   | 5    | Animal | Dog         |                 |               | C. jejuni | Pet                             |
| 8                   | 50   | ST-21 complex  | 2    | 1    | 12   | 3    | 2   | 1   | 5    | Animal | Dog         |                 |               | C. jejuni | Pet                             |
| 9                   | 50   | ST-21 complex  | 2    | 1    | 12   | 3    | 2   | 1   | 5    | Animal | Dog         |                 |               | C. jejuni | Pet                             |
| 10                  | 53   | ST-21 complex  | 2    | 1    | 21   | 3    | 2   | 1   | 5    | Animal | Cat         |                 |               | C. jejuni | Pet                             |
| 11                  | 53   | ST-21 complex  | 2    | 1    | 21   | 3    | 2   | 1   | 5    | Animal | Dog         |                 |               | C. jejuni | Pet                             |
| 12                  | 122  | ST-206 complex | 6    | 4    | 5    | 2    | 2   | 1   | 5    | Animal | Cat         |                 |               | C. jejuni | Pet                             |
| 21                  | 464  | ST-464 complex | 24   | 2    | 2    | 2    | 10  | 3   | 1    | Animal | Cat         |                 |               | C. jejuni | Pet                             |
| 22                  | 572  | ST-206 complex | 62   | 4    | 5    | 2    | 2   | 1   | 5    | Animal | Dog         |                 |               | C. jejuni | Pet                             |
| 33                  | 658  | ST-658 complex | 2    | 4    | 2    | 4    | 19  | 3   | 6    | Animal | Dog         |                 |               | C. jejuni | Pet                             |
| 34                  | 658  | ST-658 complex | 2    | 4    | 2    | 4    | 19  | 3   | 6    | Animal | Dog         |                 |               | C. jejuni | Pet                             |
| 35                  | 658  | ST-658 complex | 2    | 4    | 2    | 4    | 19  | 3   | 6    | Animal | Dog         |                 |               | C. jejuni | Pet                             |
| 57                  | 2302 | ST-828 complex | 33   | 242  | 30   | 82   | 113 | 43  | 17   | Animal | Dog         |                 |               | C. coli   | Pet                             |
| 58                  | 2302 | ST-828 complex | 33   | 242  | 30   | 82   | 113 | 43  | 17   | Animal | Dog         |                 |               | C. coli   | Pet                             |
| 63                  | 3017 | ST-828 complex | 114  | 39   | 30   | 82   | 188 | 43  | 17   | Animal | Cat         |                 |               | C. coli   | Pet                             |
| 68                  | 6998 |                | 1    | 165  | 5    | 91   | 261 | 7   | 1    | Animal | Cat         |                 |               | C. jejuni | Pet                             |
| 69                  | 6998 |                | 1    | 165  | 5    | 91   | 261 | 7   | 1    | Animal | Cat         |                 |               | C. jejuni | Pet                             |
| 13                  | 122  | ST-206 complex | 6    | 4    | 5    | 2    | 2   | 1   | 5    | Animal | Chicken     | Feces           |               | C. jejuni | Chicken                         |
| 18                  | 257  | ST-257 complex | 9    | 2    | 4    | 62   | 4   | 5   | 6    | Animal | Chicken     | Feces           |               | C. jejuni | Chicken                         |
| 51                  | 2274 |                | 9    | 17   | 5    | 10   | 350 | 3   | 3    | Animal | Chicken     | Feces           |               | C. jejuni | Chicken                         |
| 52                  | 2274 |                | 9    | 17   | 5    | 10   | 350 | 3   | 3    | Animal | Chicken     | Feces           |               | C. jejuni | Chicken                         |
| 53                  | 2274 |                | 9    | 17   | 5    | 10   | 350 | 3   | 3    | Animal | Chicken     | Feces           |               | C. jejuni | Chicken                         |
| 54                  | 2274 |                | 9    | 17   | 5    | 10   | 350 | 3   | 3    | Animal | Chicken     | Feces           |               | C. jejuni | Chicken                         |
| 55                  | 2274 |                | 9    | 17   | 5    | 10   | 350 | 3   | 3    | Animal | Chicken     | Feces           |               | C. jejuni | Chicken                         |
| 56                  | 2274 |                | 9    | 17   | 5    | 10   | 350 | 3   | 3    | Animal | Chicken     | Feces           |               | C. jejuni | Chicken                         |
| 66                  | 5434 | ST-828 complex | 33   | 39   | 30   | 82   | 572 | 47  | 17   | Animal | Chicken     | Feces           |               | C. coli   | Chicken                         |

| Isolate Designation | ST   | CC              | aspA | glnA | gltA | glyA | pgm | tkf | unclA | Origin | Animal Type | Animal Material | Food Material | Species   | Source (For Source Attribution) |
|---------------------|------|-----------------|------|------|------|------|-----|-----|-------|--------|-------------|-----------------|---------------|-----------|---------------------------------|
| 67                  | 5777 | ST-828 complex  | 33   | 39   | 65   | 82   | 113 | 43  | 17    | Animal | Chicken     | Feces           |               | C. coli   | Chicken                         |
| 77                  | 7002 |                 | 24   | 2    | 2    | 2    | 624 | 3   | 6     | Animal | Chicken     | Feces           |               | C. jejuni | Chicken                         |
| FBI-08387           | 2100 | ST-52 complex   | 9    | 25   | 2    | 10   | 22  | 3   | 8     | Food   | Chicken     |                 | Meat          | C. jejuni | Chicken                         |
| FBI-08388           | 45   | ST-45 complex   | 4    | 7    | 10   | 4    | 1   | 7   | 1     | Food   | Chicken     |                 | Meat          | C. jejuni | Chicken                         |
| FBI-08389           | 45   | ST-45 complex   | 4    | 7    | 10   | 4    | 1   | 7   | 1     | Food   | Chicken     |                 | Meat          | C. jejuni | Chicken                         |
| FBI-08390           | 1701 | ST-45 complex   | 4    | 7    | 10   | 4    | 1   | 51  | 1     | Food   | Chicken     |                 | Meat          | C. jejuni | Chicken                         |
| FBI-08391           | 572  | ST-206 complex  | 62   | 4    | 5    | 2    | 2   | 1   | 5     | Food   | Chicken     |                 | Meat          | C. jejuni | Chicken                         |
| FBI-08392           | 50   | ST-21 complex   | 2    | 1    | 12   | 3    | 2   | 1   | 5     | Food   | Chicken     |                 | Meat          | C. jejuni | Chicken                         |
| FBI-08393           | 464  | ST-464 complex  | 24   | 2    | 2    | 2    | 10  | 3   | 1     | Food   | Chicken     |                 | Meat          | C. jejuni | Chicken                         |
| FBI-08394           | 354  | ST-354 complex  | 8    | 10   | 2    | 2    | 11  | 12  | 6     | Food   | Chicken     |                 | Meat          | C. jejuni | Chicken                         |
| FBI-08395           | 7386 | ST-21 complex   | 2    | 504  | 5    | 3    | 2   | 25  | 5     | Food   | Chicken     |                 | Meat          | C. jejuni | Chicken                         |
| FBI-08396           | 2314 | ST-1034 complex | 2    | 61   | 4    | 64   | 332 | 7   | 23    | Food   | Chicken     |                 | Meat          | C. jejuni | Chicken                         |
| FBI-08397           | 7421 |                 | 2    | 61   | 120  | 38   | 40  | 34  | 40    | Food   | Chicken     |                 | Meat          | C. jejuni | Chicken                         |
| FBI-08398           | 904  | ST-607 complex  | 24   | 2    | 5    | 53   | 23  | 3   | 1     | Food   | Chicken     |                 | Meat          | C. jejuni | Chicken                         |
| FBI-08399           | 354  | ST-354 complex  | 8    | 10   | 2    | 2    | 11  | 12  | 6     | Food   | Chicken     |                 | Meat          | C. jejuni | Chicken                         |
| FBI-08400           | 45   | ST-45 complex   | 4    | 7    | 10   | 4    | 1   | 7   | 1     | Food   | Chicken     |                 | Meat          | C. jejuni | Chicken                         |
| FBI-08401           | 1301 | ST-692 complex  | 2    | 115  | 57   | 26   | 127 | 29  | 35    | Food   | Chicken     |                 | Meat          | C. jejuni | Chicken                         |
| FBI-08402           | 45   | ST-45 complex   | 4    | 7    | 10   | 4    | 1   | 7   | 1     | Food   | Chicken     |                 | Meat          | C. jejuni | Chicken                         |
| FBI-08403           | 44   | ST-21 complex   | 8    | 1    | 6    | 3    | 2   | 1   | 1     | Food   | Chicken     |                 | Meat          | C. jejuni | Chicken                         |
| FBI-08404           | 48   | ST-48 complex   | 2    | 4    | 1    | 2    | 7   | 1   | 5     | Food   | Chicken     |                 | Meat          | C. jejuni | Chicken                         |
| FBI-08405           | 7381 | ST-1332 complex | 2    | 1    | 4    | 28   | 721 | 25  | 58    | Food   | Chicken     |                 | Meat          | C. jejuni | Chicken                         |
| FBI-08406           | 7381 | ST-1332 complex | 2    | 1    | 4    | 28   | 721 | 25  | 58    | Food   | Chicken     |                 | Meat          | C. jejuni | Chicken                         |
| FBI-08407           | 48   | ST-48 complex   | 2    | 4    | 1    | 2    | 7   | 1   | 5     | Food   | Chicken     |                 | Meat          | C. jejuni | Chicken                         |
| FBI-08408           | 400  | ST-353 complex  | 8    | 17   | 5    | 2    | 10  | 59  | 6     | Food   | Chicken     |                 | Meat          | C. jejuni | Chicken                         |
| FBI-08409           | 324  | ST-354 complex  | 57   | 17   | 2    | 2    | 11  | 12  | 6     | Food   | Chicken     |                 | Meat          | C. jejuni | Chicken                         |
| FBI-08410           | 50   | ST-21 complex   | 2    | 1    | 12   | 3    | 2   | 1   | 5     | Food   | Chicken     |                 | Meat          | C. jejuni | Chicken                         |
| FBI-08411           | 7422 |                 | 2    | 15   | 4    | 3    | 154 | 25  | 1     | Food   | Chicken     |                 | Meat          | C. jejuni | Chicken                         |
| FBI-08412           | 3628 | ST-443 complex  | 7    | 17   | 2    | 337  | 23  | 3   | 12    | Food   | Chicken     |                 | Meat          | C. jejuni | Chicken                         |
| FBI-08413           | 7423 | ST-283 complex  | 4    | 7    | 40   | 4    | 42  | 51  | 35    | Food   | Chicken     |                 | Meat          | C. jejuni | Chicken                         |
| FBI-08414           | 860  | ST-828 complex  | 33   | 39   | 30   | 79   | 113 | 47  | 17    | Food   | Chicken     |                 | Meat          | C. coli   | Chicken                         |
| FBI-08415           | 5150 |                 | 292  | 66   | 30   | 82   | 113 | 206 | 17    | Food   | Chicken     |                 | Meat          | C. coli   | Chicken                         |
| FBI-08416           | 829  | ST-828 complex  | 33   | 39   | 30   | 82   | 113 | 43  | 17    | Food   | Chicken     |                 | Meat          | C. coli   | Chicken                         |
| FBI-08417           | 1628 | ST-828 complex  | 33   | 39   | 30   | 79   | 104 | 206 | 17    | Food   | Chicken     |                 | Meat          | C. coli   | Chicken                         |
| FBI-08418           | 7159 | ST-828 complex  | 33   | 39   | 418  | 82   | 104 | 85  | 17    | Food   | Chicken     |                 | Meat          | C. coli   | Chicken                         |
| FBI-08419           | 7159 | ST-828 complex  | 33   | 39   | 418  | 82   | 104 | 85  | 17    | Food   | Chicken     |                 | Meat          | C. coli   | Chicken                         |
| FBI-08420           | 7424 | ST-828 complex  | 33   | 176  | 30   | 82   | 104 | 47  | 17    | Food   | Chicken     |                 | Meat          | C. coli   | Chicken                         |
| FBI-08421           | 825  | ST-828 complex  | 33   | 39   | 30   | 82   | 113 | 47  | 17    | Food   | Chicken     |                 | Meat          | C. coli   | Chicken                         |
| FBI-08422           | 7389 | ST-828 complex  | 33   | 39   | 30   | 82   | 189 | 43  | 425   | Food   | Chicken     |                 | Meat          | C. coli   | Chicken                         |

| Isolate Designation | ST   | CC             | aspA | glnA | gltA | glyA | pgm | tkr | uncA | Origin | Animal Type | Animal Material | Food Material | Species   | Source (For Source Attribution) |
|---------------------|------|----------------|------|------|------|------|-----|-----|------|--------|-------------|-----------------|---------------|-----------|---------------------------------|
| FBI-08423           | 828  | ST-828 complex | 33   | 39   | 30   | 82   | 104 | 43  | 17   | Food   | Chicken     |                 | Meat          | C. coli   | Chicken                         |
| FBI-08424           | 825  | ST-828 complex | 33   | 39   | 30   | 82   | 113 | 47  | 17   | Food   | Chicken     |                 | Meat          | C. coli   | Chicken                         |
| FBI-08425           | 7390 | ST-828 complex | 33   | 39   | 427  | 82   | 104 | 43  | 17   | Food   | Chicken     |                 | Meat          | C. coli   | Chicken                         |
| FBI-08426           | 1767 | ST-828 complex | 33   | 39   | 30   | 79   | 113 | 44  | 17   | Food   | Chicken     |                 | Meat          | C. coli   | Chicken                         |
| FBI-08427           | 5305 | ST-828 complex | 33   | 39   | 30   | 82   | 113 | 85  | 17   | Food   | Chicken     |                 | Meat          | C. coli   | Chicken                         |
| FBI-08556           | 829  | ST-828 complex | 33   | 39   | 30   | 82   | 113 | 43  | 17   | Food   | Chicken     |                 | unknown       | C. coli   | Chicken                         |
| FBI-08557           | 7431 | ST-828 complex | 33   | 195  | 30   | 82   | 104 | 47  | 17   | Animal | Chicken     | Feces           |               | C. coli   | Chicken                         |
| FBI-08558           | 5777 | ST-828 complex | 33   | 39   | 65   | 82   | 113 | 43  | 17   | Animal | Chicken     | Feces           |               | C. coli   | Chicken                         |
| FBI-08559           | 2183 | ST-828 complex | 33   | 39   | 30   | 79   | 113 | 43  | 41   | Animal | Chicken     | Feces           |               | C. coli   | Chicken                         |
| FBI-08560           | 829  | ST-828 complex | 33   | 39   | 30   | 82   | 113 | 43  | 17   | Animal | Chicken     | Feces           |               | C. coli   | Chicken                         |
| FBI-08564           | 1519 | ST-21 complex  | 8    | 1    | 5    | 3    | 2   | 1   | 1    | Food   | Chicken     |                 | Meat          | C. jejuni | Chicken                         |
| FBI-08565           | 1519 | ST-21 complex  | 8    | 1    | 5    | 3    | 2   | 1   | 1    | Food   | Chicken     |                 | Meat          | C. jejuni | Chicken                         |
| FBI-08568           | 257  | ST-257 complex | 9    | 2    | 4    | 62   | 4   | 5   | 6    | Food   | Chicken     |                 | other         | C. jejuni | Chicken                         |
| FBI-08574           | 7394 |                | 18   | 33   | 78   | 18   | 724 | 575 | 16   | Animal | Chicken     | Feces           |               | C. jejuni | Chicken                         |
| FBI-08575           | 5970 |                | 9    | 21   | 4    | 28   | 363 | 3   | 35   | Animal | Chicken     | Feces           |               | C. jejuni | Chicken                         |
| FBI-08578           | 4800 |                | 275  | 84   | 5    | 10   | 119 | 178 | 26   | Animal | Chicken     | Feces           |               | C. jejuni | Chicken                         |
| FBI-08579           | 305  | ST-574 complex | 9    | 53   | 2    | 10   | 11  | 3   | 3    | Animal | Chicken     |                 |               | C. jejuni | Chicken                         |
| FBI-08580           | 5380 | ST-828 complex | 33   | 38   | 30   | 79   | 113 | 43  | 17   | Animal | Chicken     | Feces           |               | C. coli   | Chicken                         |
| FBI-08581           | 51   | ST-443 complex | 7    | 17   | 2    | 15   | 23  | 3   | 12   | Food   | Chicken     |                 | Meat          | C. jejuni | Chicken                         |
| FBI-08582           | 50   | ST-21 complex  | 2    | 1    | 12   | 3    | 2   | 1   | 5    | Food   | Chicken     |                 | Meat          | C. jejuni | Chicken                         |
| FBI-08583           | 4899 | ST-354 complex | 9    | 2    | 2    | 2    | 11  | 59  | 6    | Food   | Chicken     |                 | Meat          | C. jejuni | Chicken                         |
| FBI-08584           | 19   | ST-21 complex  | 2    | 1    | 5    | 3    | 2   | 1   | 5    | Food   | Chicken     |                 | Meat          | C. jejuni | Chicken                         |
| FBI-08585           | 22   | ST-22 complex  | 1    | 3    | 6    | 4    | 3   | 3   | 3    | Food   | Chicken     |                 | Meat          | C. jejuni | Chicken                         |
| FBI-08586           | 3766 |                | 22   | 28   | 4    | 28   | 363 | 3   | 35   | Food   | Chicken     |                 | Meat          | C. jejuni | Chicken                         |
| FBI-08587           | 607  | ST-607 complex | 8    | 2    | 5    | 53   | 11  | 3   | 1    | Food   | Chicken     |                 | Meat          | C. jejuni | Chicken                         |
| FBI-08588           | 2274 |                | 9    | 17   | 5    | 10   | 350 | 3   | 3    | Food   | Chicken     |                 | Meat          | C. jejuni | Chicken                         |
| FBI-08589           | 400  | ST-353 complex | 8    | 17   | 5    | 2    | 10  | 59  | 6    | Food   | Chicken     |                 | Meat          | C. jejuni | Chicken                         |
| FBI-08590           | 7054 | ST-354 complex | 8    | 10   | 2    | 2    | 19  | 12  | 6    | Food   | Chicken     |                 | Meat          | C. jejuni | Chicken                         |
| FBI-08591           | 22   | ST-22 complex  | 1    | 3    | 6    | 4    | 3   | 3   | 3    | Food   | Chicken     |                 | Meat          | C. jejuni | Chicken                         |
| FBI-08592           | 2304 |                | 2    | 4    | 5    | 25   | 11  | 3   | 5    | Food   | Chicken     |                 | Meat          | C. jejuni | Chicken                         |
| FBI-08593           | 50   | ST-21 complex  | 2    | 1    | 12   | 3    | 2   | 1   | 5    | Food   | Chicken     |                 | Meat          | C. jejuni | Chicken                         |
| FBI-08594           | 21   | ST-21 complex  | 2    | 1    | 1    | 3    | 2   | 1   | 5    | Food   | Chicken     |                 | Meat          | C. jejuni | Chicken                         |
| FBI-08595           | 1073 | ST-354 complex | 8    | 10   | 2    | 2    | 89  | 12  | 6    | Food   | Chicken     |                 | Meat          | C. jejuni | Chicken                         |
| FBI-08596           | 22   | ST-22 complex  | 1    | 3    | 6    | 4    | 3   | 3   | 3    | Food   | Chicken     |                 | Meat          | C. jejuni | Chicken                         |
| FBI-08597           | 464  | ST-464 complex | 24   | 2    | 2    | 2    | 10  | 3   | 1    | Food   | Chicken     |                 | Meat          | C. jejuni | Chicken                         |
| FBI-08598           | 50   | ST-21 complex  | 2    | 1    | 12   | 3    | 2   | 1   | 5    | Food   | Chicken     |                 | Meat          | C. jejuni | Chicken                         |
| FBI-08599           | 50   | ST-21 complex  | 2    | 1    | 12   | 3    | 2   | 1   | 5    | Food   | Chicken     |                 | Meat          | C. jejuni | Chicken                         |
| FBI-08600           | 2153 |                | 7    | 21   | 2    | 62   | 67  | 48  | 6    | Food   | Chicken     |                 | Meat          | C. jejuni | Chicken                         |

| Isolate Designation | ST   | CC             | aspA | glnA | gltA | glyA | pgm | tkf | uncA | Origin | Animal Type | Animal Material | Food Material | Species   | Source (For Source Attribution) |
|---------------------|------|----------------|------|------|------|------|-----|-----|------|--------|-------------|-----------------|---------------|-----------|---------------------------------|
| FBI-08601           | 2220 | ST-828 complex | 33   | 38   | 30   | 82   | 337 | 43  | 17   | Food   | Chicken     |                 | Meat          | C. coli   | Chicken                         |
| FBI-08602           | 1595 | ST-828 complex | 33   | 38   | 30   | 79   | 104 | 43  | 17   | Food   | Chicken     |                 | Meat          | C. coli   | Chicken                         |
| FBI-08603           | 901  | ST-828 complex | 33   | 39   | 30   | 79   | 104 | 43  | 41   | Food   | Chicken     |                 | Meat          | C. coli   | Chicken                         |
| FBI-08604           | 832  | ST-828 complex | 33   | 39   | 30   | 79   | 113 | 43  | 17   | Food   | Chicken     |                 | Meat          | C. coli   | Chicken                         |
| FBI-08605           | 855  | ST-828 complex | 33   | 39   | 30   | 79   | 104 | 35  | 17   | Food   | Chicken     |                 | Meat          | C. coli   | Chicken                         |
| 6                   | 50   | ST-21 complex  | 2    | 1    | 12   | 3    | 2   | 1   | 5    | Animal | Quail       |                 |               | C. jejuni | Other Poultry                   |
| 20                  | 354  | ST-354 complex | 8    | 10   | 2    | 2    | 11  | 12  | 6    | Animal | Quail       |                 |               | C. jejuni | Other Poultry                   |
| 23                  | 572  | ST-206 complex | 62   | 4    | 5    | 2    | 2   | 1   | 5    | Animal | Quail       |                 |               | C. jejuni | Other Poultry                   |
| 24                  | 658  | ST-658 complex | 2    | 4    | 2    | 4    | 19  | 3   | 6    | Animal | Quail       |                 |               | C. jejuni | Other Poultry                   |
| 25                  | 658  | ST-658 complex | 2    | 4    | 2    | 4    | 19  | 3   | 6    | Animal | Quail       |                 |               | C. jejuni | Other Poultry                   |
| 26                  | 658  | ST-658 complex | 2    | 4    | 2    | 4    | 19  | 3   | 6    | Animal | Quail       |                 |               | C. jejuni | Other Poultry                   |
| 27                  | 658  | ST-658 complex | 2    | 4    | 2    | 4    | 19  | 3   | 6    | Animal | Quail       |                 |               | C. jejuni | Other Poultry                   |
| 28                  | 658  | ST-658 complex | 2    | 4    | 2    | 4    | 19  | 3   | 6    | Animal | Quail       |                 |               | C. jejuni | Other Poultry                   |
| 29                  | 658  | ST-658 complex | 2    | 4    | 2    | 4    | 19  | 3   | 6    | Animal | Quail       |                 |               | C. jejuni | Other Poultry                   |
| 30                  | 658  | ST-658 complex | 2    | 4    | 2    | 4    | 19  | 3   | 6    | Animal | Quail       |                 |               | C. jejuni | Other Poultry                   |
| 31                  | 658  | ST-658 complex | 2    | 4    | 2    | 4    | 19  | 3   | 6    | Animal | Quail       |                 |               | C. jejuni | Other Poultry                   |
| 32                  | 658  | ST-658 complex | 2    | 4    | 2    | 4    | 19  | 3   | 6    | Animal | Quail       |                 |               | C. jejuni | Other Poultry                   |
| 36                  | 824  | ST-257 complex | 9    | 2    | 2    | 2    | 11  | 5   | 6    | Animal | Quail       |                 |               | C. jejuni | Other Poultry                   |
| 37                  | 829  | ST-828 complex | 33   | 39   | 30   | 82   | 113 | 43  | 17   | Animal | Quail       |                 |               | C. coli   | Other Poultry                   |
| 45                  | 1519 | ST-21 complex  | 8    | 1    | 5    | 3    | 2   | 1   | 1    | Animal | Quail       |                 |               | C. jejuni | Other Poultry                   |
| 46                  | 1586 | ST-828 complex | 33   | 176  | 30   | 82   | 113 | 43  | 17   | Animal | Quail       |                 |               | C. coli   | Other Poultry                   |
| 62                  | 2929 | ST-21 complex  | 2    | 1    | 12   | 3    | 2   | 1   | 1    | Animal | Quail       |                 |               | C. jejuni | Other Poultry                   |
| 64                  | 5172 | ST-828 complex | 33   | 195  | 30   | 79   | 113 | 43  | 17   | Animal | Quail       |                 |               | C. coli   | Other Poultry                   |
| 65                  | 5333 | ST-45 complex  | 2    | 7    | 10   | 4    | 1   | 51  | 1    | Animal | Quail       |                 |               | C. jejuni | Other Poultry                   |
| 70                  | 6999 | ST-658 complex | 2    | 4    | 27   | 4    | 19  | 3   | 6    | Animal | Quail       |                 |               | C. jejuni | Other Poultry                   |
| 71                  | 7000 |                | 7    | 21   | 2    | 62   | 525 | 48  | 1    | Animal | Quail       |                 |               | C. jejuni | Other Poultry                   |
| 72                  | 7000 |                | 7    | 21   | 2    | 62   | 525 | 48  | 1    | Animal | Quail       |                 |               | C. jejuni | Other Poultry                   |
| 73                  | 7000 |                | 7    | 21   | 2    | 62   | 525 | 48  | 1    | Animal | Quail       |                 |               | C. jejuni | Other Poultry                   |
| 74                  | 7000 |                | 7    | 21   | 2    | 62   | 525 | 48  | 1    | Animal | Quail       |                 |               | C. jejuni | Other Poultry                   |
| 75                  | 7000 |                | 7    | 21   | 2    | 62   | 525 | 48  | 1    | Animal | Quail       |                 |               | C. jejuni | Other Poultry                   |
| 76                  | 7001 |                | 7    | 21   | 2    | 62   | 525 | 48  | 5    | Animal | Quail       |                 |               | C. jejuni | Other Poultry                   |
| FBI-08562           | 50   | ST-21 complex  | 2    | 1    | 12   | 3    | 2   | 1   | 5    | Food   | Duck        |                 | Meat          | C. jejuni | Other Poultry                   |
| FBI-08563           | 3574 | ST-21 complex  | 2    | 1    | 12   | 3    | 2   | 1   | 23   | Food   | Duck        |                 | Meat          | C. jejuni | Other Poultry                   |
| FBI-08561           | 475  | ST-48 complex  | 2    | 4    | 1    | 4    | 19  | 62  | 5    | Food   | Turkey      |                 | Meat          | C. jejuni | Other Poultry                   |
| 38                  | 854  | ST-828 complex | 33   | 38   | 30   | 82   | 104 | 43  | 17   | Animal | Pig         |                 |               | C. coli   | Pig                             |
| 39                  | 854  | ST-828 complex | 33   | 38   | 30   | 82   | 104 | 43  | 17   | Animal | Pig         |                 |               | C. coli   | Pig                             |
| 40                  | 854  | ST-828 complex | 33   | 38   | 30   | 82   | 104 | 43  | 17   | Animal | Pig         |                 |               | C. coli   | Pig                             |
| 41                  | 854  | ST-828 complex | 33   | 38   | 30   | 82   | 104 | 43  | 17   | Animal | Pig         |                 |               | C. coli   | Pig                             |
| 42                  | 854  | ST-828 complex | 33   | 38   | 30   | 82   | 104 | 43  | 17   | Animal | Pig         |                 |               | C. coli   | Pig                             |

| Isolate Designation | ST   | CC             | aspA | glnA | gltA | glyA | pgm | tkr | unca | Origin | Animal Type | Animal Material | Food Material | Species | Source (For Source Attribution) |
|---------------------|------|----------------|------|------|------|------|-----|-----|------|--------|-------------|-----------------|---------------|---------|---------------------------------|
| 43                  | 854  | ST-828 complex | 33   | 38   | 30   | 82   | 104 | 43  | 17   | Animal | Pig         |                 |               | C. coli | Pig                             |
| 44                  | 1430 |                | 32   | 153  | 30   | 82   | 104 | 44  | 36   | Animal | Pig         |                 |               | C. coli | Pig                             |
| 59                  | 2642 | ST-828 complex | 33   | 38   | 30   | 79   | 104 | 35  | 17   | Animal | Pig         |                 |               | C. coli | Pig                             |
| 60                  | 2705 | ST-828 complex | 33   | 153  | 44   | 82   | 104 | 43  | 36   | Animal | Pig         |                 |               | C. coli | Pig                             |
| 61                  | 2814 | ST-828 complex | 32   | 38   | 30   | 82   | 104 | 43  | 36   | Animal | Pig         |                 |               | C. coli | Pig                             |
| 78                  | 7003 |                | 32   | 153  | 412  | 82   | 104 | 44  | 36   | Animal | Pig         |                 |               | C. coli | Pig                             |
| 79                  | 7003 |                | 32   | 153  | 412  | 82   | 104 | 44  | 36   | Animal | Pig         |                 |               | C. coli | Pig                             |
| 80                  | 7004 |                | 32   | 153  | 412  | 82   | 104 | 44  | 17   | Animal | Pig         |                 |               | C. coli | Pig                             |
| 81                  | 7005 | ST-828 complex | 33   | 39   | 30   | 161  | 104 | 117 | 17   | Animal | Pig         |                 |               | C. coli | Pig                             |
| 82                  | 7005 | ST-828 complex | 33   | 39   | 30   | 161  | 104 | 117 | 17   | Animal | Pig         |                 |               | C. coli | Pig                             |
| 83                  | 7005 | ST-828 complex | 33   | 39   | 30   | 161  | 104 | 117 | 17   | Animal | Pig         |                 |               | C. coli | Pig                             |
| 84                  | 7005 | ST-828 complex | 33   | 39   | 30   | 161  | 104 | 117 | 17   | Animal | Pig         |                 |               | C. coli | Pig                             |
| 85                  | 7005 | ST-828 complex | 33   | 39   | 30   | 161  | 104 | 117 | 17   | Animal | Pig         |                 |               | C. coli | Pig                             |
| 86                  | 7005 | ST-828 complex | 33   | 39   | 30   | 161  | 104 | 117 | 17   | Animal | Pig         |                 |               | C. coli | Pig                             |
| 87                  | 7006 | ST-828 complex | 33   | 39   | 30   | 161  | 104 | 44  | 17   | Animal | Pig         |                 |               | C. coli | Pig                             |
| FBI-08527           | 7426 | ST-828 complex | 33   | 38   | 30   | 78   | 104 | 43  | 17   | Animal | Pig         | Caecum          |               | C. coli | Pig                             |
| FBI-08528           | 1117 | ST-828 complex | 33   | 39   | 30   | 78   | 104 | 35  | 17   | Animal | Pig         | Caecum          |               | C. coli | Pig                             |
| FBI-08529           | 1156 | ST-828 complex | 33   | 39   | 30   | 79   | 104 | 64  | 17   | Animal | Pig         | Caecum          |               | C. coli | Pig                             |
| FBI-08530           | 4950 | ST-828 complex | 33   | 38   | 30   | 82   | 113 | 332 | 17   | Animal | Pig         | Caecum          |               | C. coli | Pig                             |
| FBI-08531           | 1156 | ST-828 complex | 33   | 39   | 30   | 79   | 104 | 64  | 17   | Animal | Pig         | Caecum          |               | C. coli | Pig                             |
| FBI-08532           | 1117 | ST-828 complex | 33   | 39   | 30   | 78   | 104 | 35  | 17   | Animal | Pig         | Surface carcass |               | C. coli | Pig                             |
| FBI-08533           | 1166 | ST-828 complex | 33   | 39   | 30   | 79   | 104 | 44  | 17   | Animal | Pig         | Caecum          |               | C. coli | Pig                             |
| FBI-08534           | 1108 | ST-828 complex | 33   | 39   | 30   | 78   | 113 | 43  | 17   | Animal | Pig         | Caecum          |               | C. coli | Pig                             |
| FBI-08535           | 828  | ST-828 complex | 33   | 39   | 30   | 82   | 104 | 43  | 17   | Animal | Pig         | Feces           |               | C. coli | Pig                             |
| FBI-08536           | 1554 | ST-828 complex | 33   | 66   | 30   | 82   | 118 | 43  | 17   | Animal | Pig         | Feces           |               | C. coli | Pig                             |
| FBI-08537           | 828  | ST-828 complex | 33   | 39   | 30   | 82   | 104 | 43  | 17   | Animal | Pig         | Feces           |               | C. coli | Pig                             |
| FBI-08538           | 854  | ST-828 complex | 33   | 38   | 30   | 82   | 104 | 43  | 17   | Animal | Pig         | Feces           |               | C. coli | Pig                             |
| FBI-08539           | 1103 | ST-828 complex | 33   | 39   | 30   | 174  | 104 | 35  | 17   | Animal | Pig         | Feces           |               | C. coli | Pig                             |
| FBI-08540           | 4087 |                | 33   | 38   | 44   | 82   | 104 | 44  | 68   | Animal | Pig         | Feces           |               | C. coli | Pig                             |
| FBI-08541           | 1068 | ST-828 complex | 33   | 39   | 30   | 78   | 104 | 43  | 17   | Animal | Pig         | Feces           |               | C. coli | Pig                             |
| FBI-08542           | 828  | ST-828 complex | 33   | 39   | 30   | 82   | 104 | 43  | 17   | Animal | Pig         | Feces           |               | C. coli | Pig                             |
| FBI-08544           | 7392 | ST-828 complex | 33   | 39   | 30   | 573  | 118 | 35  | 17   | Animal | Pig         | Caecum          |               | C. coli | Pig                             |
| FBI-08545           | 1103 | ST-828 complex | 33   | 39   | 30   | 174  | 104 | 35  | 17   | Animal | Pig         | Caecum          |               | C. coli | Pig                             |
| FBI-08546           | 4087 |                | 33   | 38   | 44   | 82   | 104 | 44  | 68   | Animal | Pig         | Caecum          |               | C. coli | Pig                             |
| FBI-08547           | 828  | ST-828 complex | 33   | 39   | 30   | 82   | 104 | 43  | 17   | Animal | Pig         | Caecum          |               | C. coli | Pig                             |
| FBI-08548           | 1554 | ST-828 complex | 33   | 66   | 30   | 82   | 118 | 43  | 17   | Animal | Pig         | Caecum          |               | C. coli | Pig                             |
| FBI-08549           | 7427 | ST-828 complex | 32   | 39   | 30   | 174  | 104 | 43  | 36   | Animal | Pig         | Feces           |               | C. coli | Pig                             |
| FBI-08550           | 7428 | ST-828 complex | 33   | 38   | 30   | 82   | 189 | 64  | 17   | Animal | Pig         | Caecum          |               | C. coli | Pig                             |
| FBI-08551           | 828  | ST-828 complex | 33   | 39   | 30   | 82   | 104 | 43  | 17   | Animal | Pig         | Caecum          |               | C. coli | Pig                             |

| Isolate Designation | ST   | CC             | aspA | glnA | gltA | glyA | pgm | tkr | unca | Origin | Animal Type          | Animal Material | Food Material | Species   | Source (For Source Attribution) |
|---------------------|------|----------------|------|------|------|------|-----|-----|------|--------|----------------------|-----------------|---------------|-----------|---------------------------------|
| FBI-08552           | 1096 | ST-828 complex | 33   | 38   | 30   | 82   | 104 | 35  | 17   | Animal | Pig                  | Caecum          |               | C. coli   | Pig                             |
| FBI-08553           | 7429 | ST-828 complex | 302  | 39   | 30   | 82   | 104 | 47  | 17   | Animal | Pig                  | Caecum          |               | C. coli   | Pig                             |
| FBI-08554           | 7428 | ST-828 complex | 33   | 38   | 30   | 82   | 189 | 64  | 17   | Animal | Pig                  | Caecum          |               | C. coli   | Pig                             |
| FBI-08577           | 122  | ST-206 complex | 6    | 4    | 5    | 2    | 2   | 1   | 5    | Food   | Cattle               |                 | Raw milk      | C. jejuni | Cattle                          |
| 14                  | 220  | ST-179 complex | 1    | 6    | 29   | 2    | 40  | 32  | 3    | Animal | Pigeon               |                 |               | C. jejuni | Not considered                  |
| 15                  | 220  | ST-179 complex | 1    | 6    | 29   | 2    | 40  | 32  | 3    | Animal | Pigeon               |                 |               | C. jejuni | Not considered                  |
| 16                  | 220  | ST-179 complex | 1    | 6    | 29   | 2    | 40  | 32  | 3    | Animal | Pigeon               |                 |               | C. jejuni | Not considered                  |
| 17                  | 220  | ST-179 complex | 1    | 6    | 29   | 2    | 40  | 32  | 3    | Animal | Pigeon               |                 |               | C. jejuni | Not considered                  |
| 19                  | 334  | ST-45 complex  | 4    | 7    | 40   | 4    | 42  | 7   | 1    | Animal | Pigeon               |                 |               | C. jejuni | Not considered                  |
| 47                  | 1962 |                | 55   | 172  | 21   | 49   | 125 | 83  | 51   | Animal | Pigeon               |                 |               | C. jejuni | Not considered                  |
| 48                  | 1962 |                | 55   | 172  | 21   | 49   | 125 | 83  | 51   | Animal | Pigeon               |                 |               | C. jejuni | Not considered                  |
| 49                  | 1962 |                | 55   | 172  | 21   | 49   | 125 | 83  | 51   | Animal | Pigeon               |                 |               | C. jejuni | Not considered                  |
| 50                  | 1962 |                | 55   | 172  | 21   | 49   | 125 | 83  | 51   | Animal | Pigeon               |                 |               | C. jejuni | Not considered                  |
| FBI-08570           | 220  | ST-179 complex | 1    | 6    | 29   | 2    | 40  | 32  | 3    | Animal | Pigeon (aviary bird) | Feces           |               | C. jejuni | Not considered                  |
| FBI-08571           | 4447 | ST-179 complex | 1    | 31   | 29   | 176  | 40  | 32  | 3    | Animal | Pigeon (aviary bird) | Feces           |               | C. jejuni | Not considered                  |
| FBI-08573           | 4447 | ST-179 complex | 1    | 31   | 29   | 176  | 40  | 32  | 3    | Animal | Pigeon (aviary bird) | Feces           |               | C. jejuni | Not considered                  |
| FBI-08555           | 7393 |                | 148  | 90   | 126  | 226  | 723 | 574 | 426  | Food   | Common mussel        |                 |               | C. coli   | Not considered                  |
| FBI-08566           | 5053 |                | 1    | 2    | 95   | 62   | 472 | 400 | 147  | Food   | Common mussel        |                 |               | C. jejuni | Not considered                  |
| FBI-08569           | 3573 |                | 7    | 172  | 21   | 49   | 125 | 224 | 51   | Animal | Wild bird            |                 |               | C. jejuni | Not considered                  |

**Supplementary Table S4. MLST data and relative posterior source probability of 613 human**

***Campylobacter* isolates obtained during the study period (2011-2014), according to sequence type.**

As putative sources we considered pet, chicken, cattle, pig, and poultry other than chicken (duck, goose, turkey, quail: “other poultry”). Source probabilities were assigned using asymmetric island modelling.

| Number of human isolates | MLST DATA          |                     |      |      |      |      |     |     |      | POSTERIOR ASSIGNMENT SOURCE PROBABILITIES |          |          |          |               |
|--------------------------|--------------------|---------------------|------|------|------|------|-----|-----|------|-------------------------------------------|----------|----------|----------|---------------|
|                          | Sequence Type (ST) | Clonal Complex (CC) | aspA | glnA | gltA | glyA | pgm | tkr | uncA | Pet                                       | Chicken  | Cattle   | Pig      | Other Poultry |
| 1                        | 5                  | ST-353 complex      | 7    | 2    | 5    | 2    | 10  | 3   | 6    | 0.140358                                  | 0.792519 | 0.004921 | 0.000065 | 0.062137      |
| 6                        | 19                 | ST-21 complex       | 2    | 1    | 5    | 3    | 2   | 1   | 5    | 0.329778                                  | 0.535305 | 0.075741 | 0.001287 | 0.057890      |
| 20                       | 21                 | ST-21 complex       | 2    | 1    | 1    | 3    | 2   | 1   | 5    | 0.206268                                  | 0.659486 | 0.066991 | 0.001201 | 0.066053      |
| 6                        | 22                 | ST-22 complex       | 1    | 3    | 6    | 4    | 3   | 3   | 3    | 0.316581                                  | 0.622470 | 0.022396 | 0.000743 | 0.037809      |
| 1                        | 25                 | ST-45 complex       | 4    | 7    | 10   | 1    | 1   | 7   | 1    | 0.199498                                  | 0.646314 | 0.004851 | 0.000365 | 0.148971      |
| 1                        | 42                 | ST-42 complex       | 1    | 2    | 3    | 4    | 5   | 9   | 3    | 0.361405                                  | 0.514092 | 0.083063 | 0.001401 | 0.040040      |
| 6                        | 44                 | ST-21 complex       | 8    | 1    | 6    | 3    | 2   | 1   | 1    | 0.044326                                  | 0.836094 | 0.002239 | 0.000707 | 0.116634      |
| 15                       | 45                 | ST-45 complex       | 4    | 7    | 10   | 4    | 1   | 7   | 1    | 0.214536                                  | 0.689252 | 0.009782 | 0.000746 | 0.085684      |
| 3                        | 46                 | ST-206 complex      | 2    | 21   | 5    | 3    | 2   | 1   | 5    | 0.049799                                  | 0.896103 | 0.002500 | 0.000469 | 0.051129      |
| 13                       | 48                 | ST-48 complex       | 2    | 4    | 1    | 2    | 7   | 1   | 5    | 0.270188                                  | 0.661681 | 0.018949 | 0.000711 | 0.048471      |
| 1                        | 49                 | ST-49 complex       | 3    | 1    | 5    | 17   | 11  | 11  | 6    | 0.050397                                  | 0.854069 | 0.001084 | 0.000248 | 0.094202      |
| 91                       | 50                 | ST-21 complex       | 2    | 1    | 12   | 3    | 2   | 1   | 5    | 0.160770                                  | 0.738177 | 0.020941 | 0.000787 | 0.079325      |
| 3                        | 51                 | ST-443 complex      | 7    | 17   | 2    | 15   | 23  | 3   | 12   | 0.164981                                  | 0.747140 | 0.003920 | 0.000664 | 0.083295      |
| 2                        | 52                 | ST-52 complex       | 9    | 25   | 2    | 10   | 22  | 3   | 6    | 0.257587                                  | 0.696787 | 0.005297 | 0.000557 | 0.039771      |
| 3                        | 53                 | ST-21 complex       | 2    | 1    | 21   | 3    | 2   | 1   | 5    | 0.215735                                  | 0.684886 | 0.020337 | 0.000797 | 0.078244      |
| 2                        | 61                 | ST-61 complex       | 1    | 4    | 2    | 2    | 6   | 3   | 17   | 0.308651                                  | 0.550106 | 0.096325 | 0.001607 | 0.043311      |
| 29                       | 122                | ST-206 complex      | 6    | 4    | 5    | 2    | 2   | 1   | 5    | 0.210124                                  | 0.738521 | 0.008452 | 0.000568 | 0.042335      |
| 1                        | 131                | not assigned        | 7    | 2    | 6    | 10   | 10  | 37  | 1    | 0.048351                                  | 0.899379 | 0.002103 | 0.000480 | 0.049687      |
| 4                        | 137                | ST-45 complex       | 4    | 7    | 10   | 4    | 42  | 7   | 1    | 0.373810                                  | 0.546239 | 0.007389 | 0.000732 | 0.071830      |
| 1                        | 206                | ST-206 complex      | 2    | 21   | 5    | 37   | 2   | 1   | 5    | 0.023278                                  | 0.490408 | 0.002946 | 0.002246 | 0.481122      |
| 1                        | 233                | ST-45 complex       | 2    | 7    | 10   | 4    | 1   | 7   | 1    | 0.569782                                  | 0.311637 | 0.058884 | 0.000983 | 0.058714      |
| 29                       | 257                | ST-257 complex      | 9    | 2    | 4    | 62   | 4   | 5   | 6    | 0.090015                                  | 0.847299 | 0.007854 | 0.000570 | 0.054262      |
| 7                        | 267                | ST-283 complex      | 4    | 7    | 40   | 4    | 42  | 51  | 1    | 0.132395                                  | 0.779389 | 0.016795 | 0.000735 | 0.070687      |
| 1                        | 273                | ST-206 complex      | 2    | 21   | 5    | 37   | 60  | 1   | 5    | 0.021486                                  | 0.416450 | 0.001156 | 0.000922 | 0.559986      |
| 1                        | 305                | ST-574 complex      | 9    | 53   | 2    | 10   | 11  | 3   | 3    | 0.302236                                  | 0.653541 | 0.006043 | 0.000575 | 0.037605      |
| 1                        | 324                | ST-354 complex      | 57   | 17   | 2    | 2    | 11  | 12  | 6    | 0.048462                                  | 0.899185 | 0.002110 | 0.000481 | 0.049762      |
| 4                        | 353                | ST-353 complex      | 7    | 17   | 5    | 2    | 10  | 3   | 6    | 0.277248                                  | 0.677578 | 0.005620 | 0.000562 | 0.038993      |
| 27                       | 354                | ST-354 complex      | 8    | 10   | 2    | 2    | 11  | 12  | 6    | 0.044215                                  | 0.831003 | 0.002185 | 0.000741 | 0.121856      |
| 7                        | 356                | ST-353 complex      | 14   | 17   | 5    | 2    | 11  | 3   | 6    | 0.048365                                  | 0.899256 | 0.002106 | 0.000479 | 0.049794      |
| 5                        | 400                | ST-353 complex      | 8    | 17   | 5    | 2    | 10  | 59  | 6    | 0.257317                                  | 0.697171 | 0.005296 | 0.000557 | 0.039658      |

| MLST DATA                |                    |                      |      |      |      |      |     |     |      | POSTERIOR ASSIGNMENT SOURCE PROBABILITIES |          |          |          |               |
|--------------------------|--------------------|----------------------|------|------|------|------|-----|-----|------|-------------------------------------------|----------|----------|----------|---------------|
| Number of human isolates | Sequence Type (ST) | Clonal Complex (CC)  | aspA | glnA | gltA | glyA | pgm | tkt | uncA | Pet                                       | Chicken  | Cattle   | Pig      | Other Poultry |
| 1                        | 403                | ST-403 complex       | 10   | 27   | 16   | 19   | 10  | 5   | 7    | 0.792751                                  | 0.174119 | 0.015732 | 0.000982 | 0.016416      |
| 4                        | 429                | ST-48 complex        | 7    | 4    | 5    | 2    | 11  | 1   | 5    | 0.066336                                  | 0.807177 | 0.001223 | 0.000002 | 0.125261      |
| 2                        | 441                | complex not assigned | 7    | 1    | 2    | 83   | 2   | 3   | 6    | 0.597225                                  | 0.355858 | 0.020859 | 0.000798 | 0.025261      |
| 4                        | 443                | ST-443 complex       | 24   | 17   | 2    | 15   | 23  | 3   | 12   | 0.036646                                  | 0.710168 | 0.002341 | 0.001235 | 0.249611      |
| 2                        | 446                | ST-446 complex       | 47   | 55   | 5    | 10   | 11  | 68  | 8    | 0.049357                                  | 0.829468 | 0.000789 | 0.000039 | 0.120347      |
| 23                       | 464                | ST-464 complex       | 24   | 2    | 2    | 2    | 10  | 3   | 1    | 0.076274                                  | 0.852996 | 0.002554 | 0.000555 | 0.067621      |
| 2                        | 523                | ST-658 complex       | 2    | 4    | 1    | 93   | 11  | 3   | 6    | 0.048662                                  | 0.898706 | 0.002145 | 0.000478 | 0.050009      |
| 1                        | 524                | ST-353 complex       | 8    | 17   | 5    | 2    | 10  | 3   | 1    | 0.161769                                  | 0.669112 | 0.002321 | 0.000005 | 0.166793      |
| 1                        | 534                | complex not assigned | 7    | 78   | 42   | 95   | 106 | 12  | 8    | 0.048522                                  | 0.899507 | 0.002110 | 0.000486 | 0.049376      |
| 1                        | 538                | ST-45 complex        | 4    | 7    | 10   | 4    | 42  | 25  | 1    | 0.090327                                  | 0.741363 | 0.001306 | 0.000046 | 0.166959      |
| 44                       | 572                | ST-206 complex       | 62   | 4    | 5    | 2    | 2   | 1   | 5    | 0.168130                                  | 0.767682 | 0.009495 | 0.000603 | 0.054091      |
| 1                        | 574                | ST-574 complex       | 7    | 53   | 2    | 10   | 11  | 3   | 3    | 0.225102                                  | 0.704676 | 0.002084 | 0.000037 | 0.068101      |
| 1                        | 577                | ST-21 complex        | 2    | 4    | 1    | 3    | 2   | 1   | 5    | 0.304841                                  | 0.407882 | 0.212623 | 0.002043 | 0.072611      |
| 4                        | 583                | ST-45 complex        | 4    | 7    | 10   | 4    | 42  | 51  | 1    | 0.050031                                  | 0.896641 | 0.002202 | 0.000474 | 0.050652      |
| 1                        | 587                | ST-362 complex       | 1    | 2    | 42   | 4    | 90  | 25  | 8    | 0.048603                                  | 0.899218 | 0.002124 | 0.000483 | 0.049572      |
| 1                        | 607                | ST-607 complex       | 8    | 2    | 5    | 53   | 11  | 3   | 1    | 0.257076                                  | 0.697291 | 0.005292 | 0.000555 | 0.039786      |
| 1                        | 657                | ST-658 complex       | 73   | 4    | 2    | 4    | 19  | 3   | 6    | 0.345922                                  | 0.293993 | 0.004153 | 0.000633 | 0.355299      |
| 4                        | 658                | ST-658 complex       | 2    | 4    | 2    | 4    | 19  | 3   | 6    | 0.423848                                  | 0.312928 | 0.008916 | 0.001464 | 0.252843      |
| 1                        | 677                | ST-677 complex       | 10   | 81   | 50   | 99   | 120 | 76  | 52   | 0.496654                                  | 0.464609 | 0.009455 | 0.000669 | 0.028613      |
| 1                        | 768                | complex not assigned | 7    | 2    | 5    | 72   | 22  | 102 | 6    | 0.050105                                  | 0.786872 | 0.000193 | 0.000008 | 0.162822      |
| 11                       | 824                | ST-257 complex       | 9    | 2    | 2    | 2    | 11  | 5   | 6    | 0.040268                                  | 0.774136 | 0.002252 | 0.000966 | 0.182379      |
| 7                        | 825                | ST-828 complex       | 33   | 39   | 30   | 82   | 113 | 47  | 17   | 0.049465                                  | 0.878883 | 0.005626 | 0.001482 | 0.064543      |
| 3                        | 827                | ST-828 complex       | 33   | 39   | 30   | 82   | 104 | 56  | 17   | 0.049084                                  | 0.862593 | 0.006228 | 0.000918 | 0.081176      |
| 1                        | 828                | ST-828 complex       | 33   | 39   | 30   | 82   | 104 | 43  | 17   | 0.035785                                  | 0.672856 | 0.002734 | 0.134501 | 0.154124      |
| 3                        | 829                | ST-828 complex       | 33   | 39   | 30   | 82   | 113 | 43  | 17   | 0.043909                                  | 0.848607 | 0.002096 | 0.003577 | 0.101811      |
| 2                        | 832                | ST-828 complex       | 33   | 39   | 30   | 79   | 113 | 43  | 17   | 0.040163                                  | 0.787417 | 0.002217 | 0.012774 | 0.157428      |
| 1                        | 842                | ST-21 complex        | 2    | 1    | 42   | 3    | 2   | 1   | 5    | 0.208031                                  | 0.651472 | 0.070483 | 0.000071 | 0.069942      |
| 1                        | 854                | ST-828 complex       | 33   | 38   | 30   | 82   | 104 | 43  | 17   | 0.037591                                  | 0.596634 | 0.003860 | 0.329833 | 0.032083      |
| 2                        | 860                | ST-828 complex       | 33   | 39   | 30   | 79   | 113 | 47  | 17   | 0.048492                                  | 0.816512 | 0.008848 | 0.001130 | 0.125018      |
| 2                        | 861                | ST-21 complex        | 2    | 1    | 42   | 3    | 148 | 1   | 5    | 0.117573                                  | 0.746329 | 0.083319 | 0.001317 | 0.051463      |
| 1                        | 881                | complex not assigned | 9    | 17   | 52   | 10   | 10  | 3   | 1    | 0.495388                                  | 0.465613 | 0.009421 | 0.000661 | 0.028917      |
| 4                        | 883                | ST-21 complex        | 2    | 17   | 2    | 3    | 2   | 1   | 5    | 0.324001                                  | 0.600077 | 0.006721 | 0.000684 | 0.068517      |
| 1                        | 887                | ST-828 complex       | 33   | 38   | 30   | 82   | 104 | 85  | 68   | 0.028420                                  | 0.239128 | 0.006623 | 0.715459 | 0.010370      |
| 1                        | 890                | ST-828 complex       | 33   | 38   | 30   | 82   | 104 | 35  | 36   | 0.018111                                  | 0.180024 | 0.004219 | 0.788520 | 0.009126      |
| 1                        | 899                | ST-828 complex       | 33   | 39   | 30   | 82   | 113 | 35  | 17   | 0.023137                                  | 0.369828 | 0.005159 | 0.548901 | 0.052974      |
| 7                        | 904                | ST-607 complex       | 24   | 2    | 5    | 53   | 23  | 3   | 1    | 0.259629                                  | 0.623449 | 0.005501 | 0.000816 | 0.110605      |
| 1                        | 918                | ST-48 complex        | 2    | 4    | 1    | 4    | 19  | 1   | 5    | 0.743772                                  | 0.182867 | 0.050322 | 0.001108 | 0.021931      |
| 1                        | 977                | ST-1034 complex      | 22   | 61   | 4    | 64   | 74  | 25  | 23   | 0.040258                                  | 0.774232 | 0.002250 | 0.000980 | 0.182279      |



| MLST DATA                |                    |                     |      |      |      |      |     |     |      | POSTERIOR ASSIGNMENT SOURCE PROBABILITIES |          |          |          |               |
|--------------------------|--------------------|---------------------|------|------|------|------|-----|-----|------|-------------------------------------------|----------|----------|----------|---------------|
| Number of human isolates | Sequence Type (ST) | Clonal Complex (CC) | aspA | glnA | gltA | glyA | pgm | tkt | uncA | Pet                                       | Chicken  | Cattle   | Pig      | Other Poultry |
| 1                        | 986                | not assigned        | 91   | 2    | 42   | 4    | 169 | 9   | 8    | 0.087869                                  | 0.593405 | 0.004881 | 0.000024 | 0.313822      |
| 2                        | 990                | ST-257 complex      | 9    | 2    | 4    | 62   | 4   | 133 | 6    | 0.040153                                  | 0.774339 | 0.002245 | 0.000972 | 0.182290      |
| 1                        | 991                | ST-692 complex      | 37   | 52   | 57   | 26   | 107 | 29  | 23   | 0.048515                                  | 0.899477 | 0.002111 | 0.000486 | 0.049411      |
| 1                        | 1009               | not assigned        | 32   | 66   | 66   | 82   | 163 | 43  | 17   | 0.000015                                  | 0.002075 | 0.000005 | 0.997439 | 0.000465      |
| 1                        | 1016               | ST-828 complex      | 33   | 38   | 30   | 82   | 118 | 43  | 17   | 0.038054                                  | 0.598936 | 0.003934 | 0.327162 | 0.031914      |
| 1                        | 1038               | ST-354 complex      | 8    | 10   | 5    | 2    | 11  | 12  | 6    | 0.026593                                  | 0.819756 | 0.001551 | 0.000041 | 0.152060      |
| 3                        | 1044               | ST-658 complex      | 2    | 10   | 2    | 4    | 19  | 3   | 6    | 0.496140                                  | 0.463013 | 0.009514 | 0.000655 | 0.030677      |
| 3                        | 1056               | ST-828 complex      | 33   | 39   | 30   | 82   | 104 | 43  | 36   | 0.015856                                  | 0.199322 | 0.003609 | 0.766891 | 0.014321      |
| 1                        | 1058               | ST-828 complex      | 33   | 39   | 30   | 82   | 104 | 35  | 17   | 0.028077                                  | 0.570603 | 0.002339 | 0.204179 | 0.194802      |
| 1                        | 1073               | ST-354 complex      | 8    | 10   | 2    | 2    | 89  | 12  | 6    | 0.228332                                  | 0.699518 | 0.010383 | 0.000673 | 0.061093      |
| 1                        | 1122               | ST-828 complex      | 33   | 153  | 30   | 82   | 118 | 43  | 36   | 0.000556                                  | 0.025787 | 0.000242 | 0.972192 | 0.001222      |
| 1                        | 1123               | not assigned        | 53   | 38   | 44   | 82   | 118 | 35  | 36   | 0.000716                                  | 0.025370 | 0.000354 | 0.970780 | 0.002779      |
| 1                        | 1147               | not assigned        | 53   | 38   | 30   | 82   | 118 | 44  | 36   | 0.029026                                  | 0.242359 | 0.006762 | 0.711418 | 0.010434      |
| 1                        | 1181               | ST-828 complex      | 33   | 39   | 66   | 174  | 104 | 43  | 41   | 0.022386                                  | 0.824810 | 0.001719 | 0.060453 | 0.090631      |
| 2                        | 1301               | ST-692 complex      | 2    | 115  | 57   | 26   | 127 | 29  | 35   | 0.036331                                  | 0.709746 | 0.002376 | 0.001250 | 0.250297      |
| 1                        | 1348               | ST-61 complex       | 108  | 4    | 2    | 146  | 6   | 3   | 6    | 0.023380                                  | 0.491641 | 0.002886 | 0.002284 | 0.479809      |
| 1                        | 1409               | not assigned        | 2    | 15   | 4    | 3    | 154 | 51  | 35   | 0.025185                                  | 0.903778 | 0.001311 | 0.000028 | 0.069698      |
| 2                        | 1417               | ST-828 complex      | 33   | 39   | 44   | 82   | 104 | 35  | 36   | 0.024721                                  | 0.209180 | 0.006253 | 0.750235 | 0.009611      |
| 2                        | 1450               | not assigned        | 53   | 39   | 44   | 82   | 104 | 35  | 36   | 0.001816                                  | 0.099762 | 0.000421 | 0.892764 | 0.005238      |
| 4                        | 1519               | ST-21 complex       | 8    | 1    | 5    | 3    | 2   | 1   | 1    | 0.042037                                  | 0.804861 | 0.002261 | 0.000821 | 0.150020      |
| 1                        | 1528               | ST-607 complex      | 8    | 2    | 5    | 68   | 11  | 5   | 1    | 0.103036                                  | 0.830198 | 0.001658 | 0.000004 | 0.065104      |
| 1                        | 1545               | ST-828 complex      | 33   | 39   | 30   | 82   | 118 | 43  | 17   | 0.040418                                  | 0.729121 | 0.002721 | 0.186664 | 0.041075      |
| 1                        | 1549               | ST-828 complex      | 33   | 38   | 30   | 82   | 113 | 44  | 17   | 0.004058                                  | 0.291203 | 0.000527 | 0.687058 | 0.017153      |
| 2                        | 1571               | ST-828 complex      | 32   | 39   | 30   | 82   | 104 | 43  | 36   | 0.024076                                  | 0.206388 | 0.005621 | 0.754739 | 0.009176      |
| 1                        | 1585               | ST-828 complex      | 33   | 39   | 30   | 82   | 189 | 43  | 17   | 0.045674                                  | 0.883283 | 0.002003 | 0.015007 | 0.054033      |
| 2                        | 1595               | ST-828 complex      | 33   | 38   | 30   | 79   | 104 | 43  | 17   | 0.044667                                  | 0.832443 | 0.002402 | 0.073237 | 0.047251      |
| 3                        | 1628               | ST-828 complex      | 33   | 39   | 30   | 79   | 104 | 206 | 17   | 0.054122                                  | 0.842650 | 0.012629 | 0.000884 | 0.089716      |
| 1                        | 1707               | ST-607 complex      | 9    | 2    | 5    | 2    | 11  | 3   | 1    | 0.047929                                  | 0.899422 | 0.002088 | 0.000470 | 0.050091      |
| 1                        | 1796               | ST-257 complex      | 9    | 2    | 4    | 62   | 10  | 5   | 6    | 0.085913                                  | 0.832320 | 0.004153 | 0.000737 | 0.076877      |
| 1                        | 1911               | not assigned        | 7    | 84   | 5    | 10   | 119 | 178 | 26   | 0.048149                                  | 0.897233 | 0.002092 | 0.000480 | 0.052047      |
| 2                        | 1943               | ST-21 complex       | 2    | 1    | 1    | 3    | 2   | 226 | 5    | 0.048675                                  | 0.898413 | 0.002218 | 0.000474 | 0.050220      |
| 2                        | 1947               | ST-22 complex       | 1    | 94   | 6    | 4    | 3   | 3   | 3    | 0.497042                                  | 0.463991 | 0.009519 | 0.000660 | 0.028789      |
| 2                        | 2036               | ST-353 complex      | 7    | 17   | 52   | 10   | 11  | 3   | 6    | 0.012970                                  | 0.898188 | 0.000192 | 0.000001 | 0.088649      |
| 1                        | 2057               | ST-21 complex       | 2    | 1    | 4    | 3    | 2   | 1   | 5    | 0.063584                                  | 0.749595 | 0.016222 | 0.000068 | 0.170531      |
| 1                        | 2076               | ST-353 complex      | 7    | 17   | 5    | 2    | 86  | 232 | 1    | 0.138742                                  | 0.651039 | 0.000662 | 0.000009 | 0.209548      |
| 3                        | 2079               | ST-48 complex       | 14   | 4    | 1    | 4    | 19  | 1   | 5    | 0.420365                                  | 0.504813 | 0.018435 | 0.000110 | 0.056277      |
| 1                        | 2083               | not assigned        | 8    | 2    | 2    | 212  | 309 | 253 | 147  | 0.111421                                  | 0.447491 | 0.000863 | 0.000015 | 0.440209      |
| 2                        | 2100               | ST-52 complex       | 9    | 25   | 2    | 10   | 22  | 3   | 8    | 0.048507                                  | 0.899211 | 0.002110 | 0.000481 | 0.049691      |

| MLST DATA                |                    |                     |      |      |      |      |     |     |      | POSTERIOR ASSIGNMENT SOURCE PROBABILITIES |          |          |          |               |
|--------------------------|--------------------|---------------------|------|------|------|------|-----|-----|------|-------------------------------------------|----------|----------|----------|---------------|
| Number of human isolates | Sequence Type (ST) | Clonal Complex (CC) | aspA | glnA | gltA | glyA | pgm | tkt | uncA | Pet                                       | Chicken  | Cattle   | Pig      | Other Poultry |
| 1                        | 2122               | ST-353 complex      | 7    | 17   | 5    | 2    | 86  | 3   | 1    | 0.135191                                  | 0.734584 | 0.001051 | 0.000016 | 0.129158      |
| 1                        | 2123               | ST-362 complex      | 1    | 2    | 42   | 4    | 2   | 25  | 8    | 0.046231                                  | 0.871421 | 0.004509 | 0.000053 | 0.077787      |
| 1                        | 2130               | not assigned        | 43   | 194  | 2    | 213  | 19  | 231 | 148  | 0.223885                                  | 0.248594 | 0.001526 | 0.000079 | 0.525916      |
| 1                        | 2133               | not assigned        | 55   | 21   | 2    | 71   | 11  | 37  | 3    | 0.009973                                  | 0.769138 | 0.000032 | 0.000000 | 0.220857      |
| 1                        | 2209               | ST-179 complex      | 1    | 6    | 29   | 176  | 40  | 32  | 3    | 0.113046                                  | 0.362203 | 0.000554 | 0.000000 | 0.524197      |
| 2                        | 2254               | ST-257 complex      | 8    | 2    | 4    | 62   | 4   | 5   | 6    | 0.048102                                  | 0.895292 | 0.002156 | 0.000449 | 0.054002      |
| 13                       | 2274               | not assigned        | 9    | 17   | 5    | 10   | 350 | 3   | 3    | 0.048336                                  | 0.899458 | 0.002106 | 0.000480 | 0.049621      |
| 2                        | 2275               | ST-52 complex       | 9    | 2    | 1    | 10   | 22  | 3   | 6    | 0.204158                                  | 0.698226 | 0.016467 | 0.000004 | 0.081146      |
| 3                        | 2304               | not assigned        | 2    | 4    | 5    | 25   | 11  | 3   | 5    | 0.050105                                  | 0.897275 | 0.002178 | 0.000475 | 0.049968      |
| 2                        | 2497               | ST-22 complex       | 1    | 3    | 6    | 294  | 3   | 3   | 3    | 0.299963                                  | 0.615387 | 0.011804 | 0.000384 | 0.072462      |
| 1                        | 2508               | ST-828 complex      | 33   | 38   | 30   | 82   | 104 | 35  | 68   | 0.001292                                  | 0.061194 | 0.000358 | 0.931553 | 0.005604      |
| 1                        | 2642               | ST-828 complex      | 33   | 38   | 30   | 79   | 104 | 35  | 17   | 0.040280                                  | 0.737011 | 0.002707 | 0.176366 | 0.043636      |
| 1                        | 2801               | ST-353 complex      | 7    | 112  | 5    | 62   | 11  | 3   | 6    | 0.042899                                  | 0.861759 | 0.001304 | 0.000051 | 0.093987      |
| 1                        | 2814               | ST-828 complex      | 32   | 38   | 30   | 82   | 104 | 43  | 36   | 0.019271                                  | 0.187373 | 0.004465 | 0.779746 | 0.009145      |
| 1                        | 2897               | not assigned        | 7    | 71   | 5    | 303  | 11  | 67  | 1    | 0.048384                                  | 0.899426 | 0.002102 | 0.000481 | 0.049608      |
| 1                        | 3017               | ST-828 complex      | 114  | 39   | 30   | 82   | 188 | 43  | 17   | 0.368205                                  | 0.588922 | 0.007156 | 0.000724 | 0.034993      |
| 1                        | 3335               | ST-206 complex      | 62   | 4    | 5    | 10   | 2   | 1   | 5    | 0.080468                                  | 0.845073 | 0.002632 | 0.000032 | 0.071795      |
| 1                        | 3339               | ST-828 complex      | 33   | 39   | 30   | 82   | 414 | 43  | 17   | 0.047489                                  | 0.899253 | 0.002073 | 0.000594 | 0.050591      |
| 1                        | 3628               | ST-443 complex      | 7    | 17   | 2    | 337  | 23  | 3   | 12   | 0.048493                                  | 0.899143 | 0.002109 | 0.000482 | 0.049774      |
| 1                        | 3633               | ST-21 complex       | 2    | 1    | 1    | 5    | 2   | 343 | 5    | 0.658567                                  | 0.240952 | 0.041135 | 0.000050 | 0.059296      |
| 3                        | 3720               | ST-49 complex       | 3    | 1    | 5    | 10   | 11  | 11  | 6    | 0.048394                                  | 0.899313 | 0.002119 | 0.000481 | 0.049693      |
| 1                        | 4086               | ST-828 complex      | 33   | 39   | 44   | 82   | 104 | 44  | 68   | 0.026468                                  | 0.224105 | 0.006177 | 0.733440 | 0.009810      |
| 3                        | 4709               | ST-828 complex      | 33   | 39   | 30   | 296  | 104 | 85  | 17   | 0.047479                                  | 0.899307 | 0.002074 | 0.000590 | 0.050550      |
| 1                        | 4713               | ST-607 complex      | 166  | 17   | 5    | 10   | 11  | 3   | 1    | 0.030309                                  | 0.764600 | 0.000225 | 0.000001 | 0.204865      |
| 1                        | 4735               | ST-21 complex       | 2    | 1    | 12   | 407  | 2   | 1   | 5    | 0.153805                                  | 0.695091 | 0.010345 | 0.000389 | 0.140370      |
| 2                        | 4801               | not assigned        | 7    | 21   | 2    | 62   | 525 | 48  | 6    | 0.047612                                  | 0.886170 | 0.002075 | 0.000474 | 0.063669      |
| 1                        | 4811               | not assigned        | 6    | 4    | 52   | 2    | 89  | 282 | 5    | 0.062157                                  | 0.850905 | 0.003635 | 0.000000 | 0.083303      |
| 1                        | 5018               | ST-21 complex       | 2    | 1    | 1    | 3    | 492 | 1   | 5    | 0.329500                                  | 0.302257 | 0.305320 | 0.004113 | 0.058810      |
| 4                        | 5150               | not assigned        | 292  | 66   | 30   | 82   | 113 | 206 | 17   | 0.035803                                  | 0.708775 | 0.002330 | 0.001422 | 0.251670      |
| 1                        | 5203               | not assigned        | 2    | 15   | 4    | 28   | 20  | 34  | 35   | 0.009437                                  | 0.875968 | 0.000507 | 0.000030 | 0.114059      |
| 1                        | 5306               | ST-828 complex      | 33   | 38   | 30   | 82   | 104 | 468 | 17   | 0.027452                                  | 0.231793 | 0.006407 | 0.724247 | 0.010102      |
| 1                        | 5326               | not assigned        | 188  | 313  | 5    | 2    | 89  | 5   | 6    | 0.072431                                  | 0.582167 | 0.000927 | 0.000002 | 0.344472      |
| 1                        | 5759               | not assigned        | 22   | 28   | 4    | 295  | 372 | 99  | 35   | 0.001783                                  | 0.169818 | 0.000085 | 0.000048 | 0.828266      |
| 1                        | 5776               | not assigned        | 32   | 39   | 30   | 81   | 118 | 44  | 36   | 0.000245                                  | 0.004826 | 0.000174 | 0.994522 | 0.000233      |
| 1                        | 6175               | ST-21 complex       | 2    | 1    | 5    | 10   | 608 | 1   | 5    | 0.163118                                  | 0.672439 | 0.011194 | 0.000035 | 0.153214      |
| 1                        | 6409               | ST-1034 complex     | 2    | 15   | 4    | 3    | 154 | 25  | 23   | 0.008954                                  | 0.861326 | 0.000317 | 0.000031 | 0.129372      |
| 2                        | 6461               | ST-353 complex      | 2    | 17   | 5    | 2    | 10  | 59  | 6    | 0.281230                                  | 0.634880 | 0.012270 | 0.000049 | 0.071571      |
| 1                        | 6557               | not assigned        | 76   | 22   | 165  | 98   | 146 | 254 | 16   | 0.028445                                  | 0.650297 | 0.000048 | 0.000003 | 0.321206      |

| MLST DATA                |                    |                     |      |      |      |      |     |     |      | POSTERIOR ASSIGNMENT SOURCE PROBABILITIES |          |          |          |               |
|--------------------------|--------------------|---------------------|------|------|------|------|-----|-----|------|-------------------------------------------|----------|----------|----------|---------------|
| Number of human isolates | Sequence Type (ST) | Clonal Complex (CC) | aspA | glnA | gltA | glyA | pgm | tkt | uncA | Pet                                       | Chicken  | Cattle   | Pig      | Other Poultry |
| 1                        | 6813               | not assigned        | 2    | 17   | 52   | 10   | 11  | 3   | 6    | 0.251598                                  | 0.559242 | 0.003838 | 0.000000 | 0.185321      |
| 1                        | 6909               | ST-574 complex      | 9    | 2    | 2    | 10   | 11  | 3   | 3    | 0.208607                                  | 0.726205 | 0.006692 | 0.000039 | 0.058458      |
| 3                        | 7000               | not assigned        | 7    | 21   | 2    | 62   | 525 | 48  | 1    | 0.027797                                  | 0.570244 | 0.002636 | 0.001880 | 0.397443      |
| 1                        | 7143               | ST-21 complex       | 2    | 1    | 1    | 563  | 2   | 309 | 5    | 0.192449                                  | 0.586162 | 0.020591 | 0.000338 | 0.200460      |
| 1                        | 7159               | ST-828 complex      | 33   | 39   | 418  | 82   | 104 | 85  | 17   | 0.047681                                  | 0.899375 | 0.002082 | 0.000587 | 0.050276      |
| 1                        | 7214               | ST-828 complex      | 33   | 39   | 103  | 82   | 104 | 47  | 17   | 0.006529                                  | 0.681348 | 0.000329 | 0.004860 | 0.306934      |
| 1                        | 7377               | ST-828 complex      | 33   | 38   | 30   | 82   | 113 | 571 | 17   | 0.045465                                  | 0.733602 | 0.001920 | 0.136081 | 0.082932      |
| 1                        | 7378               | not assigned        | 7    | 17   | 2    | 572  | 86  | 232 | 1    | 0.104912                                  | 0.491112 | 0.000348 | 0.000006 | 0.403621      |
| 1                        | 7379               | ST-1034 complex     | 2    | 61   | 4    | 64   | 332 | 7   | 422  | 0.050495                                  | 0.853720 | 0.001087 | 0.000249 | 0.094450      |
| 1                        | 7380               | ST-21 complex       | 2    | 501  | 12   | 3    | 2   | 1   | 5    | 0.152735                                  | 0.696640 | 0.010245 | 0.000388 | 0.139992      |
| 1                        | 7381               | ST-1332 complex     | 2    | 1    | 4    | 28   | 721 | 25  | 58   | 0.048502                                  | 0.898980 | 0.002142 | 0.000481 | 0.049894      |
| 1                        | 7382               | ST-828 complex      | 33   | 502  | 30   | 240  | 722 | 43  | 17   | 0.013095                                  | 0.555618 | 0.000154 | 0.221545 | 0.209587      |
| 1                        | 7383               | ST-21 complex       | 2    | 1    | 12   | 3    | 2   | 573 | 5    | 0.153742                                  | 0.695213 | 0.010337 | 0.000390 | 0.140317      |
| 1                        | 7384               | ST-52 complex       | 9    | 503  | 2    | 10   | 22  | 3   | 6    | 0.246085                                  | 0.674932 | 0.002807 | 0.000286 | 0.075890      |
| 1                        | 7385               | not assigned        | 32   | 38   | 30   | 82   | 104 | 43  | 424  | 0.030014                                  | 0.290704 | 0.003633 | 0.652291 | 0.023358      |
| 1                        | 7387               | ST-353 complex      | 8    | 7    | 5    | 2    | 10  | 59  | 6    | 0.256998                                  | 0.671461 | 0.004511 | 0.000039 | 0.066992      |
| 1                        | 7388               | not assigned        | 22   | 28   | 2    | 82   | 363 | 3   | 35   | 0.015834                                  | 0.824610 | 0.001227 | 0.000871 | 0.157459      |
| 1                        | 7391               | not assigned        | 365  | 71   | 5    | 62   | 2   | 1   | 1    | 0.008003                                  | 0.680535 | 0.000665 | 0.000001 | 0.310796      |
| 1                        | 7395               | ST-828 complex      | 33   | 39   | 30   | 79   | 104 | 117 | 36   | 0.000201                                  | 0.058698 | 0.000050 | 0.929697 | 0.011353      |
| 1                        | 7396               | ST-353 complex      | 2    | 17   | 52   | 10   | 10  | 3   | 6    | 0.469658                                  | 0.411864 | 0.011830 | 0.000007 | 0.106641      |
| 3                        | 7397               | ST-21 complex       | 2    | 1    | 1    | 3    | 141 | 1   | 5    | 0.045348                                  | 0.750818 | 0.011925 | 0.000089 | 0.191820      |
| 1                        | 7399               | not assigned        | 32   | 39   | 30   | 81   | 118 | 43  | 36   | 0.000009                                  | 0.000599 | 0.000006 | 0.999325 | 0.000062      |
| 1                        | 7401               | not assigned        | 2    | 21   | 5    | 62   | 67  | 3   | 216  | 0.035434                                  | 0.579253 | 0.004749 | 0.000096 | 0.380468      |
| 1                        | 7402               | ST-354 complex      | 2    | 10   | 12   | 2    | 11  | 12  | 6    | 0.030784                                  | 0.641042 | 0.005211 | 0.000004 | 0.322959      |
| 1                        | 7403               | ST-45 complex       | 4    | 7    | 10   | 526  | 42  | 7   | 1    | 0.337890                                  | 0.530058 | 0.003839 | 0.000363 | 0.127850      |
| 1                        | 7404               | not assigned        | 9    | 17   | 5    | 10   | 127 | 3   | 3    | 0.009027                                  | 0.868463 | 0.000311 | 0.000030 | 0.122169      |
| 2                        | 7405               | ST-354 complex      | 8    | 7    | 5    | 2    | 11  | 59  | 6    | 0.151381                                  | 0.738266 | 0.001677 | 0.000003 | 0.108673      |
| 1                        | 7406               | not assigned        | 32   | 39   | 30   | 79   | 118 | 117 | 17   | 0.000006                                  | 0.003198 | 0.000004 | 0.995725 | 0.001067      |
| 1                        | 7408               | ST-49 complex       | 3    | 1    | 5    | 82   | 104 | 11  | 6    | 0.002995                                  | 0.802379 | 0.000328 | 0.085149 | 0.109150      |
| 1                        | 7409               | ST-49 complex       | 3    | 1    | 5    | 17   | 104 | 11  | 6    | 0.011649                                  | 0.842172 | 0.000387 | 0.003476 | 0.142316      |
| 1                        | 7410               | not assigned        | 62   | 4    | 44   | 82   | 104 | 1   | 36   | 0.074626                                  | 0.510491 | 0.047767 | 0.292885 | 0.074232      |
| 1                        | 7411               | ST-828 complex      | 32   | 39   | 30   | 82   | 113 | 43  | 36   | 0.001753                                  | 0.054805 | 0.000532 | 0.937674 | 0.005235      |
| 2                        | 7412               | ST-828 complex      | 33   | 39   | 30   | 82   | 231 | 43  | 17   | 0.009065                                  | 0.872239 | 0.000353 | 0.002182 | 0.116161      |
| 1                        | 7413               | not assigned        | 7    | 4    | 2    | 2    | 19  | 1   | 26   | 0.009262                                  | 0.879858 | 0.000316 | 0.000028 | 0.110536      |
| 1                        | 7414               | ST-828 complex      | 33   | 1    | 30   | 82   | 113 | 43  | 17   | 0.106264                                  | 0.730077 | 0.008545 | 0.000905 | 0.154209      |
| 1                        | 7415               | ST-661 complex      | 2    | 28   | 4    | 406  | 90  | 34  | 1    | 0.001579                                  | 0.518909 | 0.000105 | 0.000000 | 0.479408      |
| 1                        | 7416               | ST-353 complex      | 7    | 2    | 12   | 299  | 10  | 3   | 6    | 0.033365                                  | 0.874078 | 0.002475 | 0.000035 | 0.090048      |
| 1                        | 7417               | not assigned        | 22   | 61   | 4    | 28   | 363 | 99  | 35   | 0.002715                                  | 0.311636 | 0.000277 | 0.000098 | 0.685274      |

| MLST DATA                |                    |                     |      |      |      |      |     |     |      | POSTERIOR ASSIGNMENT SOURCE PROBABILITIES |          |          |          |               |
|--------------------------|--------------------|---------------------|------|------|------|------|-----|-----|------|-------------------------------------------|----------|----------|----------|---------------|
| Number of human isolates | Sequence Type (ST) | Clonal Complex (CC) | aspA | glnA | gltA | glyA | pgm | tkt | uncA | Pet                                       | Chicken  | Cattle   | Pig      | Other Poultry |
| 1                        | 7419               | ST-21 complex       | 2    | 1    | 12   | 79   | 2   | 1   | 5    | 0.032982                                  | 0.767136 | 0.005058 | 0.001130 | 0.193694      |
| 1                        | 7420               | not assigned        | 27   | 255  | 105  | 18   | 25  | 160 | 16   | 0.028465                                  | 0.650277 | 0.000048 | 0.000003 | 0.321207      |
| 1                        | 7425               | ST-828 complex      | 33   | 39   | 30   | 82   | 113 | 77  | 17   | 0.047907                                  | 0.810917 | 0.001851 | 0.004866 | 0.134459      |
| 1                        | 8480               | not assigned        | 364  | 633  | 536  | 274  | 708 | 572 | 94   | 0.169992                                  | 0.332961 | 0.002747 | 0.002067 | 0.492233      |

## **SUPPLEMENTARY INFORMATION**

### **Questionnaire for the case-control study**

## Information about your illness

First we would like to ask you about the symptoms caused by your *Campylobacter* infection.

- 1. Which of the following symptoms of illness did you have?** More than one answer is possible. If the question does not apply to you, please answer with "No".

|                                                     | Yes                      | No                       | Don't know               |
|-----------------------------------------------------|--------------------------|--------------------------|--------------------------|
| Loose and/or watery stools                          | <input type="checkbox"/> | <input type="checkbox"/> | <input type="checkbox"/> |
| Diarrhoea (3 oder more unformed stools in 24 hours) | <input type="checkbox"/> | <input type="checkbox"/> | <input type="checkbox"/> |
| Visible blood in stool                              | <input type="checkbox"/> | <input type="checkbox"/> | <input type="checkbox"/> |
| Abdominal pain                                      | <input type="checkbox"/> | <input type="checkbox"/> | <input type="checkbox"/> |
| Nausea                                              | <input type="checkbox"/> | <input type="checkbox"/> | <input type="checkbox"/> |
| Vomiting                                            | <input type="checkbox"/> | <input type="checkbox"/> | <input type="checkbox"/> |
| Headache                                            | <input type="checkbox"/> | <input type="checkbox"/> | <input type="checkbox"/> |
| Fever (i.e., body temperature above 38,5°C)         | <input type="checkbox"/> | <input type="checkbox"/> | <input type="checkbox"/> |
| Other symptoms of illness                           | <input type="checkbox"/> | <input type="checkbox"/> | <input type="checkbox"/> |

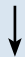

- 1.1 If Yes, which other symptoms did you have related to your *Campylobacter* infection?**
- 

- 2. When did the diarrhoea begin? If you did not have diarrhoea, when did the first symptoms of illness begin?**

Please give the date as precisely as possible.

Day

Month

Year

Don't know

- 3. On how many days in total did you have diarrhoea? If you did not have diarrhoea, how many days did the symptoms you described above last?**

Days

Don't know

- 3.1 Are the symptoms still ongoing?**

Yes

No

Don't know

4. Did you take an antibiotic because of the *Campylobacter* infection (for example, erythromycin, ciprofloxacin)?

Yes

No

Don't know

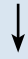

4.1 If Yes, which one(s)?

\_\_\_\_\_

5. Did you have to stay away from work because of the *Campylobacter* infection?

Yes

No  → Please continue with question 6

I am not employed.  → Please continue with question 6

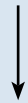

5.1 If Yes, for how many working days?

\_\_\_\_\_  
Working days

I am still unable to work

6. Were you treated in a hospital because of the *Campylobacter* infection (with at least one overnight stay)?

Yes

No  → Please continue with question 7.

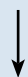

6.1 If Yes, how long did you stay in the hospital?

Please report the number of nights that you spent in hospital.

\_\_\_\_\_  
Nights

Don't know

## Travelling

Here we would like to know if you could have become infected with *Campylobacter* during a trip to another country.

### 7. Have you travelled to another country in the seven days before the onset of your illness?

Yes

No  → Please continue with question 8.

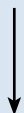

#### 7.1 If Yes, which country/countries have you been to?

---

## Contact with water

### 8. Did you go swimming/paddling in the seven days before the onset of your illness?

Yes

No  → Please continue with question 9.

Don't know  → Please continue with question 9.

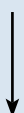

#### 8.1 If Yes, where did you go swimming or paddling?

More than one answer is possible. If the question does not apply to you, please answer with "No".

|                                                   | Yes                      | No                       | Don't know               |
|---------------------------------------------------|--------------------------|--------------------------|--------------------------|
| In a public swimming pool (outdoor or indoor)     | <input type="checkbox"/> | <input type="checkbox"/> | <input type="checkbox"/> |
| In a lake, river, stream                          | <input type="checkbox"/> | <input type="checkbox"/> | <input type="checkbox"/> |
| In an ocean                                       | <input type="checkbox"/> | <input type="checkbox"/> | <input type="checkbox"/> |
| In a private swimming pool with chlorinated water | <input type="checkbox"/> | <input type="checkbox"/> | <input type="checkbox"/> |
| In a pool/paddling pool with unchlorinated water  | <input type="checkbox"/> | <input type="checkbox"/> | <input type="checkbox"/> |



## Preparation and consumption of food

In the following section we would like to ask you about food items that you eat or drink as part of your normal diet as well as food items that you ate or drank in the seven days before the onset of your illness. It may be helpful to have a calendar at hand and look up special events or appointments you may have had in this time period.

### 9. Do you follow one of the following diets predominantly ?

Vegetarian or vegan

Koscher (Jewish dietary laws)

Halal (Islamic dietary laws)

Special diet (e.g. macrobiotic diet; food combining diet)

None of the listed diets/  
no diet

Don't know

→ If Yes, please continue with question 9.1

#### 9.1 What kind of diet do you follow predominantly?

---

### 10. Do you eat meat, meat products, or sausage products?

Yes

No

→ Please continue with question 15.

## Meat, meat products and sausage products

- 11. How often (on average) do you eat meat, meat products, or sausage products that are made from parts of the following animals?**  
Please choose the answer that applies best to you.

|                                           | Several times per week   | About once per week      | About one to three times per month | Less than once per month | Never                    |
|-------------------------------------------|--------------------------|--------------------------|------------------------------------|--------------------------|--------------------------|
| Pig                                       | <input type="checkbox"/> | <input type="checkbox"/> | <input type="checkbox"/>           | <input type="checkbox"/> | <input type="checkbox"/> |
| Cattle or calf                            | <input type="checkbox"/> | <input type="checkbox"/> | <input type="checkbox"/>           | <input type="checkbox"/> | <input type="checkbox"/> |
| Sheep or lamb                             | <input type="checkbox"/> | <input type="checkbox"/> | <input type="checkbox"/>           | <input type="checkbox"/> | <input type="checkbox"/> |
| Poultry (e.g., chicken, turkey)           | <input type="checkbox"/> | <input type="checkbox"/> | <input type="checkbox"/>           | <input type="checkbox"/> | <input type="checkbox"/> |
| Game (e.g., boar, deer, rabbit, pheasant) | <input type="checkbox"/> | <input type="checkbox"/> | <input type="checkbox"/>           | <input type="checkbox"/> | <input type="checkbox"/> |

- 12. In the seven days before the onset of your illness did you eat the following kinds of meat or meat products? Please indicate also the state of the meat (e.g., raw or medium rare).**  
More than one answer is possible. If the question does not apply to you, please answer with "No".

| As schnitzel, diced/sliced meat, roast, or steak etc.             | Raw                      | Partly raw or undercooked | Completely cooked        | No                       | Don't know               |
|-------------------------------------------------------------------|--------------------------|---------------------------|--------------------------|--------------------------|--------------------------|
| Chicken                                                           | <input type="checkbox"/> | <input type="checkbox"/>  | <input type="checkbox"/> | <input type="checkbox"/> | <input type="checkbox"/> |
| Turkey                                                            | <input type="checkbox"/> | <input type="checkbox"/>  | <input type="checkbox"/> | <input type="checkbox"/> | <input type="checkbox"/> |
| Duck or goose                                                     | <input type="checkbox"/> | <input type="checkbox"/>  | <input type="checkbox"/> | <input type="checkbox"/> | <input type="checkbox"/> |
| Pork                                                              | <input type="checkbox"/> | <input type="checkbox"/>  | <input type="checkbox"/> | <input type="checkbox"/> | <input type="checkbox"/> |
| Beef or veal                                                      | <input type="checkbox"/> | <input type="checkbox"/>  | <input type="checkbox"/> | <input type="checkbox"/> | <input type="checkbox"/> |
| Mutton or lamb                                                    | <input type="checkbox"/> | <input type="checkbox"/>  | <input type="checkbox"/> | <input type="checkbox"/> | <input type="checkbox"/> |
| Game (e.g., boar, deer, rabbit, pheasant)                         | <input type="checkbox"/> | <input type="checkbox"/>  | <input type="checkbox"/> | <input type="checkbox"/> | <input type="checkbox"/> |
| Ground/minced meat                                                | Raw                      | Partly raw or undercooked | Completely cooked        | No                       | Don't know               |
| Half and half (pork <u>and</u> beef)                              | <input type="checkbox"/> | <input type="checkbox"/>  | <input type="checkbox"/> | <input type="checkbox"/> | <input type="checkbox"/> |
| Pork (e.g. Mett/Hackepeter (=ground pork with spices), meat loaf) | <input type="checkbox"/> | <input type="checkbox"/>  | <input type="checkbox"/> | <input type="checkbox"/> | <input type="checkbox"/> |
| Beef (e.g. beef tatar)                                            | <input type="checkbox"/> | <input type="checkbox"/>  | <input type="checkbox"/> | <input type="checkbox"/> | <input type="checkbox"/> |
| Poultry                                                           | <input type="checkbox"/> | <input type="checkbox"/>  | <input type="checkbox"/> | <input type="checkbox"/> | <input type="checkbox"/> |
| Offal (e.g. liver, kidney)                                        | Raw                      | Partly raw or undercooked | Completely cooked        | No                       | Don't know               |
| Poultry                                                           | <input type="checkbox"/> | <input type="checkbox"/>  | <input type="checkbox"/> | <input type="checkbox"/> | <input type="checkbox"/> |
| Pig                                                               | <input type="checkbox"/> | <input type="checkbox"/>  | <input type="checkbox"/> | <input type="checkbox"/> | <input type="checkbox"/> |
| Cattle or calf                                                    | <input type="checkbox"/> | <input type="checkbox"/>  | <input type="checkbox"/> | <input type="checkbox"/> | <input type="checkbox"/> |

**13. In the seven days before the onset of your illness did you eat grilled meat at home or at a friend's or a relative's home?**

Yes   
↓

No  → Please continue with question 14.

Don't know  → Please continue with question 14.

**13.1 What kind of meat did you eat?** More than one answer is possible.  
If the question does not apply to you, please answer with "No".

|                                                   | Yes                      | No                       | Don't know               |
|---------------------------------------------------|--------------------------|--------------------------|--------------------------|
| Sausage made from pork                            | <input type="checkbox"/> | <input type="checkbox"/> | <input type="checkbox"/> |
| Sausage made from poultry meat                    | <input type="checkbox"/> | <input type="checkbox"/> | <input type="checkbox"/> |
| Sausage made from beef or veal                    | <input type="checkbox"/> | <input type="checkbox"/> | <input type="checkbox"/> |
| Chicken meat (e.g., chicken breast, chicken legs) | <input type="checkbox"/> | <input type="checkbox"/> | <input type="checkbox"/> |
| Turkey meat (e.g., turkey steak, turkey breast)   | <input type="checkbox"/> | <input type="checkbox"/> | <input type="checkbox"/> |
| Pork (e.g., pork belly, cutlet, skewers)          | <input type="checkbox"/> | <input type="checkbox"/> | <input type="checkbox"/> |
| Beef or veal (e.g., beef steak, fillet)           | <input type="checkbox"/> | <input type="checkbox"/> | <input type="checkbox"/> |
| Mutton or lamb (e.g., steak, fillet)              | <input type="checkbox"/> | <input type="checkbox"/> | <input type="checkbox"/> |
| Ground meat (e.g., hamburger, cevapcici)          | <input type="checkbox"/> | <input type="checkbox"/> | <input type="checkbox"/> |

**14. In the seven days before the onset of your illness did you eat the following sausage products/cold cuts?**

More than one answer is possible. If the question does not apply to you, please answer with "No".

|                                                                          | Yes                      | No                       | Don't know               |
|--------------------------------------------------------------------------|--------------------------|--------------------------|--------------------------|
| Mettwurst                                                                | <input type="checkbox"/> | <input type="checkbox"/> | <input type="checkbox"/> |
| Teewurst                                                                 | <input type="checkbox"/> | <input type="checkbox"/> | <input type="checkbox"/> |
| Salami or mini salami                                                    | <input type="checkbox"/> | <input type="checkbox"/> | <input type="checkbox"/> |
| Cervelatwurst                                                            | <input type="checkbox"/> | <input type="checkbox"/> | <input type="checkbox"/> |
| Sausage/cold cuts that contains poultry meat (chicken or turkey)         | <input type="checkbox"/> | <input type="checkbox"/> | <input type="checkbox"/> |
| Raw ham, smoked (e.g. Schwarzwälder, Holsteiner, Westfälischer Schinken) | <input type="checkbox"/> | <input type="checkbox"/> | <input type="checkbox"/> |

## Other food items

**15. In the seven days before the onset of your illness did you eat one or more of the following food items?**

More than one answer is possible. If the question does not apply to you, please answer with "No".

|                                                                                 | Yes                      | No                       | Don't know               |
|---------------------------------------------------------------------------------|--------------------------|--------------------------|--------------------------|
| Bagged lettuce or lettuce mix (ready-to-eat)                                    | <input type="checkbox"/> | <input type="checkbox"/> | <input type="checkbox"/> |
| Raw vegetables (e.g. tomato, cucumber, pepper, mushroom)                        | <input type="checkbox"/> | <input type="checkbox"/> | <input type="checkbox"/> |
| Sprouts or seedlings (e.g. alfalfa, mung bean, soy bean, cress) or sprout salad | <input type="checkbox"/> | <input type="checkbox"/> | <input type="checkbox"/> |
| Unpeeled fruit<br>(e.g., apples, pears, nectarines)                             | <input type="checkbox"/> | <input type="checkbox"/> | <input type="checkbox"/> |
| Fresh herbs (e.g. parsley, basil)                                               | <input type="checkbox"/> | <input type="checkbox"/> | <input type="checkbox"/> |
| Food items that contain raw eggs<br>(e.g. tiramisu, home-made mayonnaise)       | <input type="checkbox"/> | <input type="checkbox"/> | <input type="checkbox"/> |
| Raw mussels (e.g. oysters)                                                      | <input type="checkbox"/> | <input type="checkbox"/> | <input type="checkbox"/> |

## Milk products

**16. In the seven days before the onset of your illness did you drink raw milk or eat products made from unpasteurised milk?**

More than one answer is possible. If the question does not apply to you, please answer with "No".

Raw milk is untreated milk that was not heated above 40°C (unpasteurised). Raw milk can be purchased directly from a farmer („**milk from a farm**“) or, specially labelled, in a store („**certified raw milk**“).

|                                             | Yes                      | No                       | Don't know               |
|---------------------------------------------|--------------------------|--------------------------|--------------------------|
| Raw milk from a farm                        | <input type="checkbox"/> | <input type="checkbox"/> | <input type="checkbox"/> |
| Certified raw milk                          | <input type="checkbox"/> | <input type="checkbox"/> | <input type="checkbox"/> |
| Raw milk product<br>(e.g., raw milk cheese) | <input type="checkbox"/> | <input type="checkbox"/> | <input type="checkbox"/> |

**16.1. If you answered at least one question with "Yes", did you always heat the raw milk before you consumed it?**

Yes

No

Don't know

**17. In the seven days before the onset of your illness did you eat food items that were purchased directly on a farm or in a farm store?**

Yes   
↓

No  → Please continue with question 18.

Don't know  → Please continue with question 18.

**17.1 If "Yes", what kind(s) of food was that?**

More than one answer is possible. If the question does not apply to you, please answer with "No."

|                          | Yes                      | No                       | Don't know               |
|--------------------------|--------------------------|--------------------------|--------------------------|
| Meat/meat products       | <input type="checkbox"/> | <input type="checkbox"/> | <input type="checkbox"/> |
| Vegetables/lettuce/herbs | <input type="checkbox"/> | <input type="checkbox"/> | <input type="checkbox"/> |
| Fruit                    | <input type="checkbox"/> | <input type="checkbox"/> | <input type="checkbox"/> |
| Milk/milk products       | <input type="checkbox"/> | <input type="checkbox"/> | <input type="checkbox"/> |
| Eggs                     | <input type="checkbox"/> | <input type="checkbox"/> | <input type="checkbox"/> |

**18. Does your professional work or the professional work of a person living in your household involve contact with raw meat, e.g. as a cook, in a butcher's, or a slaughterhouse?**

|                                                     | Yes                      | No                       |
|-----------------------------------------------------|--------------------------|--------------------------|
| My work                                             | <input type="checkbox"/> | <input type="checkbox"/> |
| Work of another person living in the same household | <input type="checkbox"/> | <input type="checkbox"/> |

**18.1 If "Yes", what kind of profession do you (or the other person) have?**

---

## Preparation of food

19. Which person in your household predominately prepares the food?  
Please give only one answer.

Me

Another person

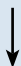

- 19.1 If you chose „Another person“, please let us know what your relationship with that person is (e.g. spouse).

Please do not tell us that person's name.

---

20. In the seven days before the onset of your illness did you prepare raw meat in your household? Please give only one answer.

Yes

No

Don't know

Raw meat is not prepared in my household.

→ Please continue with question 28

**21. How often (on average) is poultry meat prepared in your household?**

Please give only one answer.

- Several times per week
- About once per week
- About one to three times per month
- Less than once per month
- Never
- Don't know

→ Please continue with question 23

**22. In the seven days before the onset of your illness was one or more of the following poultry meat products prepared in your household?**

More than one answer is possible. If the question does not apply to you, please answer with "No".

| <b>Fresh poultry meat (e.g. from the meat counter or a farmer's market)</b> | Yes                      | No                       | Don't know               |
|-----------------------------------------------------------------------------|--------------------------|--------------------------|--------------------------|
| Whole chicken                                                               | <input type="checkbox"/> | <input type="checkbox"/> | <input type="checkbox"/> |
| Chicken meat (e.g., breast, leg, wing)                                      | <input type="checkbox"/> | <input type="checkbox"/> | <input type="checkbox"/> |
| Turkey meat (e.g., breast, leg, wing)                                       | <input type="checkbox"/> | <input type="checkbox"/> | <input type="checkbox"/> |
| Ground poultry meat                                                         | <input type="checkbox"/> | <input type="checkbox"/> | <input type="checkbox"/> |
| Offal (e.g. liver, kidney) from chicken or turkey                           | <input type="checkbox"/> | <input type="checkbox"/> | <input type="checkbox"/> |
| <b>Packaged meat (e.g. from the refrigerated counter)</b>                   | Yes                      | No                       | Don't know               |
| Whole chicken                                                               | <input type="checkbox"/> | <input type="checkbox"/> | <input type="checkbox"/> |
| Chicken meat (e.g. breast, leg, wing)                                       | <input type="checkbox"/> | <input type="checkbox"/> | <input type="checkbox"/> |
| Turkey meat (e.g. breast, leg, wing)                                        | <input type="checkbox"/> | <input type="checkbox"/> | <input type="checkbox"/> |
| Ground poultry meat                                                         | <input type="checkbox"/> | <input type="checkbox"/> | <input type="checkbox"/> |
| Offal (e.g. liver, kidney) from chicken or turkey                           | <input type="checkbox"/> | <input type="checkbox"/> | <input type="checkbox"/> |
| Ready-made poultry products (e.g., fried fillet strips)                     | <input type="checkbox"/> | <input type="checkbox"/> | <input type="checkbox"/> |
| <b>Frozen poultry products</b>                                              | Yes                      | No                       | Don't know               |
| Whole chicken                                                               | <input type="checkbox"/> | <input type="checkbox"/> | <input type="checkbox"/> |
| Chicken meat (e.g. breast, leg, wing)                                       | <input type="checkbox"/> | <input type="checkbox"/> | <input type="checkbox"/> |
| Turkey meat (e.g. breast, leg, wing)                                        | <input type="checkbox"/> | <input type="checkbox"/> | <input type="checkbox"/> |
| Ground poultry meat                                                         | <input type="checkbox"/> | <input type="checkbox"/> | <input type="checkbox"/> |
| Offal (e.g. liver, kidney) from chicken or turkey                           | <input type="checkbox"/> | <input type="checkbox"/> | <input type="checkbox"/> |
| Ready-made poultry products (e.g. chicken nuggets, breaded schnitzel)       | <input type="checkbox"/> | <input type="checkbox"/> | <input type="checkbox"/> |

**23. How often (on average) is pork prepared in your household?**  
Please give only one answer.

- |                                    |                          |
|------------------------------------|--------------------------|
| Several times per week             | <input type="checkbox"/> |
| About once per week                | <input type="checkbox"/> |
| About one to three times per month | <input type="checkbox"/> |
| Less than once per month           | <input type="checkbox"/> |
| Never                              | <input type="checkbox"/> |
| Don't know                         | <input type="checkbox"/> |

**24. How often (on average) is beef or veal prepared in your household?**  
Please give only one answer.

- |                                    |                          |
|------------------------------------|--------------------------|
| Several times per week             | <input type="checkbox"/> |
| About once per week                | <input type="checkbox"/> |
| About one to three times per month | <input type="checkbox"/> |
| Less than once per month           | <input type="checkbox"/> |
| Never                              | <input type="checkbox"/> |
| Don't know                         | <input type="checkbox"/> |



**25. In the seven days before the onset of your illness did you prepare one or more of the following food items and raw meat together (for the same meal) ?**

More than one answer is possible. If the question does not apply to you, please answer with "No".

|                                                                               | Yes                      | No                       | Don't know               |
|-------------------------------------------------------------------------------|--------------------------|--------------------------|--------------------------|
| Lettuce                                                                       | <input type="checkbox"/> | <input type="checkbox"/> | <input type="checkbox"/> |
| Vegetables that were eaten <u>uncooked</u><br>(e.g. tomato, cucumber, pepper) | <input type="checkbox"/> | <input type="checkbox"/> | <input type="checkbox"/> |
| Sprouts or seedlings<br>(e.g. alfalfa, mung bean, soy bean sprouts, cress)    | <input type="checkbox"/> | <input type="checkbox"/> | <input type="checkbox"/> |
| Fresh herbs (e.g. parsley, basil)                                             | <input type="checkbox"/> | <input type="checkbox"/> | <input type="checkbox"/> |
| Fruit                                                                         | <input type="checkbox"/> | <input type="checkbox"/> | <input type="checkbox"/> |

**26. Do you use separate utensils (e.g., cutting board, knife) for the preparation of raw meat and other food items (e.g., raw vegetables)?**

Always       Most of the time       Don't know   
 Sometimes   
 Never

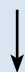

**26.1 If you answered „Most of the time“, „Sometimes“ or „Never“, do you clean kitchen utensils (e.g, cutting board, knife) with hot water and soap immediately after preparing raw meat?**

Yes       No       Don't know

**27. In your household are kitchen utensils that came into contact with raw meat cleaned in a dishwasher?**

Always       Most of the time       Don't know   
 Sometimes   
 Never

## Eating out

**28. How often (on average) do you eat out, e.g. in a restaurant, a canteen, at a friend's home?**

Please give only one answer.

|                                    |                          |
|------------------------------------|--------------------------|
| Several times per week             | <input type="checkbox"/> |
| About once per week                | <input type="checkbox"/> |
| About one to three times per month | <input type="checkbox"/> |
| Less than once per month           | <input type="checkbox"/> |
| Never                              | <input type="checkbox"/> |

**29. In the seven days before the onset of your illness did you eat out, e.g. in a restaurant, canteen, at a friend's home, or eat take-out food?**

Yes

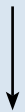

No  → Please continue with question 31

Don't know  → Please continue with question 31

**29.1 If "Yes", where did you eat out or buy take-out food?**

More than one answer is possible. If the question does not apply to you, please answer "No".

|                                                | Yes                      | No                       | Don't know               |
|------------------------------------------------|--------------------------|--------------------------|--------------------------|
| At a bakery or a café                          | <input type="checkbox"/> | <input type="checkbox"/> | <input type="checkbox"/> |
| At a restaurant                                | <input type="checkbox"/> | <input type="checkbox"/> | <input type="checkbox"/> |
| At a fast-food chain restaurant                | <input type="checkbox"/> | <input type="checkbox"/> | <input type="checkbox"/> |
| At a food stall or similar (e.g., doner stall) | <input type="checkbox"/> | <input type="checkbox"/> | <input type="checkbox"/> |
| At a canteen (e.g., at work, at university)    | <input type="checkbox"/> | <input type="checkbox"/> | <input type="checkbox"/> |
| In school/day care center                      | <input type="checkbox"/> | <input type="checkbox"/> | <input type="checkbox"/> |
| In a private household (friend(s)/relative(s)) | <input type="checkbox"/> | <input type="checkbox"/> | <input type="checkbox"/> |
| In a hospital/nursery home                     | <input type="checkbox"/> | <input type="checkbox"/> | <input type="checkbox"/> |

**30. When eating out in the seven days before the onset of your illness did you eat one or more of the following food items?**

More than one answer is possible. If the question does not apply to you, please answer "No".

|                                                                                             | Yes                      | No                       | Don't know               |
|---------------------------------------------------------------------------------------------|--------------------------|--------------------------|--------------------------|
| Sandwich, baguette                                                                          | <input type="checkbox"/> | <input type="checkbox"/> | <input type="checkbox"/> |
| Asian dish with chicken (e.g., fried noodles)                                               | <input type="checkbox"/> | <input type="checkbox"/> | <input type="checkbox"/> |
| Duck meat                                                                                   | <input type="checkbox"/> | <input type="checkbox"/> | <input type="checkbox"/> |
| Chicken doner                                                                               | <input type="checkbox"/> | <input type="checkbox"/> | <input type="checkbox"/> |
| Grilled chicken                                                                             | <input type="checkbox"/> | <input type="checkbox"/> | <input type="checkbox"/> |
| Chicken schnitzel or poultry meat strips                                                    | <input type="checkbox"/> | <input type="checkbox"/> | <input type="checkbox"/> |
| Chicken burger/chicken nuggets/chicken wings                                                | <input type="checkbox"/> | <input type="checkbox"/> | <input type="checkbox"/> |
| Hamburger or other burgers with beef or pork (on a bun)                                     | <input type="checkbox"/> | <input type="checkbox"/> | <input type="checkbox"/> |
| Beef or veal steak                                                                          | <input type="checkbox"/> | <input type="checkbox"/> | <input type="checkbox"/> |
| Bratwurst/Currywurst                                                                        | <input type="checkbox"/> | <input type="checkbox"/> | <input type="checkbox"/> |
| Hamburger meat from pork (e.g., Bulette/Frikadelle) (without bun)                           | <input type="checkbox"/> | <input type="checkbox"/> | <input type="checkbox"/> |
| Eggs (e.g., on a salad, on a sandwich)                                                      | <input type="checkbox"/> | <input type="checkbox"/> | <input type="checkbox"/> |
| Lettuce or lettuce mix                                                                      | <input type="checkbox"/> | <input type="checkbox"/> | <input type="checkbox"/> |
| Sprouts or seedlings (e.g., alfalfa, mung bean, or soy bean sprouts, cress) or sprout salad | <input type="checkbox"/> | <input type="checkbox"/> | <input type="checkbox"/> |
| Precut fruit or berries                                                                     | <input type="checkbox"/> | <input type="checkbox"/> | <input type="checkbox"/> |
| Raw mussels (e.g., oysters)                                                                 | <input type="checkbox"/> | <input type="checkbox"/> | <input type="checkbox"/> |
| Sushi                                                                                       | <input type="checkbox"/> | <input type="checkbox"/> | <input type="checkbox"/> |

## Animal contact

**31. In the seven days before the onset of your illness did you have contact with animals (pets, farm animals, wild animals), that is, did you touch the animals or come into contact with their faeces?**

Yes

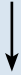

No  → Please continue with question 32

Don't know  → Please continue with question 32

**31.1 In the seven days before the onset of your illness did you touch one or more of the following animals (or the animals' faeces) in one of the listed locations?**

More than one answer is possible. If the question does not apply to you, please answer "No".

| <b>PETS</b>                                                  | Own household/<br>farm   | Zoo,<br>petting zoo,<br>game reserve | On a visit<br>(e.g., to farm,<br>friends) | Other location           | No                       | Don't<br>know            |
|--------------------------------------------------------------|--------------------------|--------------------------------------|-------------------------------------------|--------------------------|--------------------------|--------------------------|
| Dogs                                                         | <input type="checkbox"/> | <input type="checkbox"/>             | <input type="checkbox"/>                  | <input type="checkbox"/> | <input type="checkbox"/> | <input type="checkbox"/> |
| Cats                                                         | <input type="checkbox"/> | <input type="checkbox"/>             | <input type="checkbox"/>                  | <input type="checkbox"/> | <input type="checkbox"/> | <input type="checkbox"/> |
| Rodents<br>(e.g. hamsters,<br>guinea pigs,<br>rabbits, rats) | <input type="checkbox"/> | <input type="checkbox"/>             | <input type="checkbox"/>                  | <input type="checkbox"/> | <input type="checkbox"/> | <input type="checkbox"/> |
| Birds<br>(e.g. parrots,<br>budgerigars)                      | <input type="checkbox"/> | <input type="checkbox"/>             | <input type="checkbox"/>                  | <input type="checkbox"/> | <input type="checkbox"/> | <input type="checkbox"/> |
| Reptiles<br>(e.g. turtles, snakes,<br>lizards)               | <input type="checkbox"/> | <input type="checkbox"/>             | <input type="checkbox"/>                  | <input type="checkbox"/> | <input type="checkbox"/> | <input type="checkbox"/> |
| <b>FARM ANIMALS</b>                                          | Own household/<br>farm   | Zoo,<br>petting zoo,<br>game reserve | On a visit<br>(e.g., to farm,<br>friends) | Other location           | No                       | Don't<br>know            |
| Cattle or calves                                             | <input type="checkbox"/> | <input type="checkbox"/>             | <input type="checkbox"/>                  | <input type="checkbox"/> | <input type="checkbox"/> | <input type="checkbox"/> |
| Pigs                                                         | <input type="checkbox"/> | <input type="checkbox"/>             | <input type="checkbox"/>                  | <input type="checkbox"/> | <input type="checkbox"/> | <input type="checkbox"/> |
| Sheep                                                        | <input type="checkbox"/> | <input type="checkbox"/>             | <input type="checkbox"/>                  | <input type="checkbox"/> | <input type="checkbox"/> | <input type="checkbox"/> |
| Goats                                                        | <input type="checkbox"/> | <input type="checkbox"/>             | <input type="checkbox"/>                  | <input type="checkbox"/> | <input type="checkbox"/> | <input type="checkbox"/> |
| Horses                                                       | <input type="checkbox"/> | <input type="checkbox"/>             | <input type="checkbox"/>                  | <input type="checkbox"/> | <input type="checkbox"/> | <input type="checkbox"/> |
| Chickens                                                     | <input type="checkbox"/> | <input type="checkbox"/>             | <input type="checkbox"/>                  | <input type="checkbox"/> | <input type="checkbox"/> | <input type="checkbox"/> |
| Ducks/Geese                                                  | <input type="checkbox"/> | <input type="checkbox"/>             | <input type="checkbox"/>                  | <input type="checkbox"/> | <input type="checkbox"/> | <input type="checkbox"/> |
| <b>WILD ANIMALS</b>                                          | Own household/<br>farm   | Zoo,<br>petting zoo,<br>game reserve | On a visit<br>(e.g., to farm,<br>friends) | Other location           | No                       | Don't<br>know            |
| Boars                                                        | <input type="checkbox"/> | <input type="checkbox"/>             | <input type="checkbox"/>                  | <input type="checkbox"/> | <input type="checkbox"/> | <input type="checkbox"/> |
| Deers                                                        | <input type="checkbox"/> | <input type="checkbox"/>             | <input type="checkbox"/>                  | <input type="checkbox"/> | <input type="checkbox"/> | <input type="checkbox"/> |
| Wild birds<br>(e.g., pigeons, sparrows)                      | <input type="checkbox"/> | <input type="checkbox"/>             | <input type="checkbox"/>                  | <input type="checkbox"/> | <input type="checkbox"/> | <input type="checkbox"/> |

**32. In the seven days before the onset of your illness did you touch sand from a sandbox or on a playground (e.g., in children's day care centre)?**

Yes

No

Don't know

**33. Does your professional work or the professional work of a person living in your household involve animal contact, e.g., as a farmer, veterinarian?**

|                                                     | Yes                      | No                       |
|-----------------------------------------------------|--------------------------|--------------------------|
| My work                                             | <input type="checkbox"/> | <input type="checkbox"/> |
| Work of another person living in the same household | <input type="checkbox"/> | <input type="checkbox"/> |

**33.1 If "Yes", what kind of profession do you (or the other person) have?**

\_\_\_\_\_

## Contact persons

**34. How many persons are living in your household, including yourself?**

\_\_\_\_ Persons

**35. Are children living in your household that...**

|                                      | Yes                      | No                       |
|--------------------------------------|--------------------------|--------------------------|
| ever wear diapers?                   | <input type="checkbox"/> | <input type="checkbox"/> |
| attend kindergarten/day care centre? | <input type="checkbox"/> | <input type="checkbox"/> |

**36. Does your professional work or the professional work of a person living in your household involve contact with children under six years of age, e.g., in a kindergarten?**

|                                                     | Yes                      | No                       |
|-----------------------------------------------------|--------------------------|--------------------------|
| My work                                             | <input type="checkbox"/> | <input type="checkbox"/> |
| Work of another person living in the same household | <input type="checkbox"/> | <input type="checkbox"/> |

**36.1 If "Yes", what kind of profession do you (or the other person) have?**

---

**37. Do you know of anyone else who had diarrhoea at the same time as you (or in the two weeks before or after the onset of your illness) ?**

Yes

No  → Please continue with question 38

Don't know  → Please continue with question 38

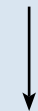

**37.1 If "Yes", who is this person/are these persons?**

Please indicate, if these persons developed symptoms "at the same time", "earlier" or "later", compared to you. More than one answer is possible.

|                                     | Same time<br>(+/- 3 days) | Earlier<br>(more than 3 days) | Later<br>(more than 3 days) |
|-------------------------------------|---------------------------|-------------------------------|-----------------------------|
| Person living in the same household | <input type="checkbox"/>  | <input type="checkbox"/>      | <input type="checkbox"/>    |
| Colleague at work or fellow student | <input type="checkbox"/>  | <input type="checkbox"/>      | <input type="checkbox"/>    |
| Friend, acquaintance, relative      | <input type="checkbox"/>  | <input type="checkbox"/>      | <input type="checkbox"/>    |
| Other person                        | <input type="checkbox"/>  | <input type="checkbox"/>      | <input type="checkbox"/>    |

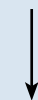

**37.2 If you chose „Other person“, please let us know what your relationship with that person is. Please do not tell us that person's name.**

---

## Medication

38. In the four weeks before the onset of your *Campylobacter* infection did you take antibiotics (e.g., penicillin, amoxicillin, doxycyclin) because of another illness?

Yes

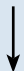

38.1 If "Yes", which one(s)?

---

No

Don't know

39. In the four weeks before the onset of your *Campylobacter* infection did you take gastric acid inhibitors, i.e., medication that reduces gastric acid (e.g., Omeprazol, Pantoprazol, Ranitidin®, Nexium®), because of other health problems?

Yes

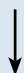

39.1 If "Yes", which one(s)?

---

No

Don't know

40. In the four weeks before the onset of your *Campylobacter* infection did you take medication or receive treatment (e.g. chemotherapy) that weakens the immune system?

Yes

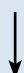

40.1 If "Yes", which one(s)?

---

No

Don't know

**41. Have you ever been diagnosed with one or more of the following diseases?**  
More than one answer is possible. If the question does not apply to you, please answer "No".

|                                                                | Yes                      | No                       |
|----------------------------------------------------------------|--------------------------|--------------------------|
| Diabetes mellitus                                              | <input type="checkbox"/> | <input type="checkbox"/> |
| Chronic inflammatory intestinal disease (e.g. Crohn's disease) | <input type="checkbox"/> | <input type="checkbox"/> |
| Stomach ulcer                                                  | <input type="checkbox"/> | <input type="checkbox"/> |
| Cancer                                                         | <input type="checkbox"/> | <input type="checkbox"/> |

**42. Have you ever been diagnosed with a *Campylobacter* infection before?**

Yes

No

Don't know



## Personal information

43. Please let us know your month and year of birth:

Month                      Year

44. Please indicate your sex:

female                       male

45. What is the zip code of your home address?

\_\_\_\_\_

46. Which country were you born in?

In Germany

---

In another country  in : \_\_\_\_\_

**47. What citizenship do you have?**

German

Other citizenship

Which one? \_\_\_\_\_

**48. Since when have you predominantly lived in Germany?**

Since my birth

or since (year) | | | | |

**49. What is your professional training?**

Please indicate the highest degree only.

Still in professional training (trainee, university student, high school student)

No professional degree (and not in training)

Apprenticeship qualification ("Lehre" (dual vocational training)), commercial college, technical college or similar

Advanced technical college, engineering college or similar

University

Other degree

**Please enter today's date:**

|     |       |      |
|-----|-------|------|
|     |       |      |
| Day | Month | Year |

**Would you like to comment on the study or this questionnaire?**

Please write down your comments here.

---

---

---

---

---

## Written Consent

Hereby I,

\_\_\_\_\_  
(Last name, first name)

living in

\_\_\_\_\_  
(Street, street number)

\_\_\_\_\_  
(Zip code, town)

declare that I have been informed in writing in an accompanying letter about the "Population based study on risk factors and molecular epidemiology of *Campylobacter* infections in humans". I agree to participate in this scientific study. I agree that data obtained as part of this study will be anonymised and saved electronically and that the anonymised study results will be published. I have been informed that I can withdraw my consent at any time without giving reasons and without disadvantages for me, and that I can withdraw my permission for the processing of my data.

If you would like to withdraw your permission, please contact the Robert Koch Institute at 030-18754-3360.

**I agree that the *Campylobacter* bacterial sample from my stool sample can be analysed further.**

No

Yes

\_\_\_\_\_  
(Place, Date)

\_\_\_\_\_  
Signature of participant

**May we contact you again during this study if we have questions?**

Yes

No

**If you agree to be contacted again, what is the best way to reach you?**

**Telephone number or email address:**

\_\_\_\_\_

**Please put the completed questionnaire in the stamped addressed envelope provided.**

**This page will be separated from the rest of the questionnaire and stored separately at the Robert Koch Institute.**
